# Supplementary material for: The iron-catalyzed selective hydrodeoxygenation and hydrodesulfurization of (thio)esters by hydrosilylation under blue light activation for access to (thio)ethers
Source: Royal Society of Chemistry journal article supplement (doi:10.1039/d5cc06110e), 2025-12-02
Supplement: d5cc06110e1.pdf [file d5cc06110e1.pdf]

## *Supporting Information*

Q. Zhang, V. Massé, C. Darcel\*

### **Table of Contents**

|                                                                                                          |     |
|----------------------------------------------------------------------------------------------------------|-----|
| 1. General Remarks                                                                                       | S2  |
| 2. Sulfane synthesis                                                                                     | S2  |
| 2.1. Typical procedure for thioester deoxygenation (Procedure 1)                                         | S2  |
| 2.2. Characterization of sulfanes.                                                                       | S3  |
| 3. Ether oxide synthesis                                                                                 | S6  |
| 3.1. Typical procedure for thioester desulfurization (Procedure 2)                                       | S6  |
| 3.2. Typical procedure for carboxylic ester deoxygenation (Procedure 3)                                  | S7  |
| 3.3. Characterization of ether oxides                                                                    | S7  |
| 4. Preparation and characterizations of the starting thioester substrates                                | S9  |
| 5. $^1\text{H}$ NMR, $^{13}\text{C}\{^1\text{H}\}$ and $^{19}\text{F}$ NMR spectra of prepared compounds | S14 |
| 6. Experimental data for mechanism discussion                                                            | S48 |
| 7. References                                                                                            | S55 |

## 1. General Method

All reagents were obtained from commercial sources and used as received. THF and toluene were dried using a MBraun Solvent Purification System and stored under an argon atmosphere. All reactions were carried out under argon atmosphere. Technical grade petroleum ether (40-60 °C bp.) and ethyl acetate were used for chromatography column. <sup>1</sup>H NMR spectra were recorded in CDCl<sub>3</sub> at ambient temperature on Bruker AVANCE 400 and 500 spectrometers at 400 MHz or 500 MHz, respectively, using the solvent as internal standard (7.26 ppm). <sup>13</sup>C NMR spectra were obtained at 101 MHz or 126 MHz and referenced to the internal solvent signals (central peak is 77.0 ppm). Chemical shift ( $\delta$ ) and coupling constants ( $J$ ) are given in ppm and in Hz, respectively. The peak patterns are indicated as follows: (s, singlet; d, doublet; t, triplet; q, quartet; pent, pentuplet; m, multiplet, and br. for broad). GC analyses were performed with GC-2014 (Shimadzu) 2010 equipped with a 30-m capillary column (Supelco, SPBTM-20, fused silica capillary column, 30 M $\times$ 0.25 mm $\times$ 0.25 mm film thickness), was used with N<sub>2</sub>/air as vector gas. GCMS were measured by GCMS-QP2010S (Shimadzu) with GC-2010 equipped with a 30-m capillary column (Supelco, SLBTM-5ms, fused silica capillary column, 30 M $\times$ 0.25 mm $\times$ 0.25 mm film thickness), was used with helium as vector gas. The following GC conditions were used: initial temperature 80 °C, for 2 minutes, then rate 10 °C/min. until 225 °C and 225 °C for 15 minutes.

## 2. Sulfane synthesis

### 2.1. Typical procedure for thioester deoxygenation (Procedure 1)

In a dry Schlenk tube, with a magnetic bar, Fe<sub>2</sub>(CO)<sub>9</sub> (11.0 mg, 0.015 mmol, 10 mol%), thioester **1** (0.3 mmol, 1 equiv.), phenylsilane (97.2 mg, 0.9 mmol, 3 equiv.) and dry toluene (0.2 mL) were added successively under an argon atmosphere. Then, the mixture was stirred upon Blue LED-light irradiation (2 $\times$ 24 W, 450-460 nm) at ambient temperature. After 24 h, the reaction was quenched by adding NaOH (1M, 1 mL) and MeOH (1 mL) and stirred at ambient temperature for 2 h. Then, the mixture was extracted with dichloromethane and the organic layer was collected, dried with anhydrous Na<sub>2</sub>SO<sub>4</sub>, filtered and concentrated in vacuum. The residue was distilled through using a Kugel Rohr bulb-to-bulb apparatus under vacuum, and then the pure thioether **2** was obtained after flash chromatography on silica eluting with petroleum ether and ethyl acetate (20:1 to 10:1).

## 2.2. Characterizations of the sulfanes

### Benzyl(4-methylbenzyl)sulfane **2a**<sup>[1]</sup>

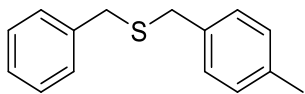

The compound **2a** was prepared as described in the general procedure **1** (colorless oil, 63 mg, 93 % isolated yield).

**<sup>1</sup>H NMR (400 MHz, CDCl<sub>3</sub>)** δ 7.30-7.20 (m, 5H), 7.16-7.05 (m, 4H), 3.56 (s, 2H), 3.53 (s, 2H), 2.30 (s, 3H).

**<sup>13</sup>C{<sup>1</sup>H} NMR (101 MHz, CDCl<sub>3</sub>)** δ 138.25, 136.57, 135.01, 129.14, 128.98, 128.87, 128.43, 126.90, 35.57, 35.31, 21.07.

**MS (EI):** m/z (%) = 228 (M<sup>+</sup>, 6), 105 (16), 91 (100).

### Dibenzylsulfane **2b**<sup>[1,6]</sup>

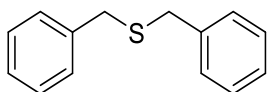

The compound **2b** was prepared as described in the general procedure **1** (colorless oil, 59 mg, 93 % isolated yield).

**<sup>1</sup>H NMR (400 MHz, CDCl<sub>3</sub>)** δ 7.37-7.31 (m, 5H), 7.29-7.25 (m, 5H), 3.63 (s, 4H).

**<sup>13</sup>C{<sup>1</sup>H} NMR (101 MHz, CDCl<sub>3</sub>)** δ 137.38, 129.41, 128.48, 127.42, 43.31.

**MS (EI):** m/z (%) = 214 (M<sup>+</sup>, 6), 91 (100), 65 (23).

### (4-Methoxybenzyl)(4-methylbenzyl)sulfane **2c**<sup>[2]</sup>

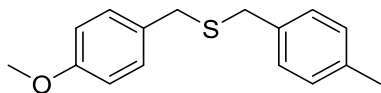

The compound **2c** was prepared as described in the general procedure **1** (colorless oil, 67 mg, 87 % isolated yield).

**<sup>1</sup>H NMR (400 MHz, CDCl<sub>3</sub>)** δ 7.23-7.15 (m, 4H), 7.12 (d, *J* = 7.8 Hz, 2H), 6.85 (d, *J* = 8.6 Hz, 2H), 3.81 (s, 3H), 3.57 (s, 2H), 3.56 (s, 2H), 2.34 (s, 3H).

**<sup>13</sup>C{<sup>1</sup>H} NMR (101 MHz, CDCl<sub>3</sub>)** δ 158.58, 136.52, 135.13, 130.18, 130.04, 129.13, 128.86, 113.86, 55.27, 35.25, 34.96, 21.07.

**MS (EI):** m/z (%) = 258 (M<sup>+</sup>, 6), 91 (100), 77 (23).

### (4-Methylbenzyl)(2,4,6-trimethylbenzyl)sulfane **2d**

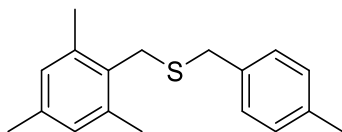

The compound **2d** was prepared as described in the general procedure **1** (colorless oil, 67 mg, 83 % isolated yield).

**<sup>1</sup>H NMR (400 MHz, CDCl<sub>3</sub>)** δ 7.25 (d, *J* = 8.0 Hz, 2H), 7.13 (d, *J* = 7.8 Hz, 2H), 6.79 (s, 2H), 3.74 (s, 2H), 3.62 (s, 2H), 2.35 (s, 3H), 2.25 (s, 6H), 2.23 (s, 3H).

**<sup>13</sup>C{<sup>1</sup>H} NMR (101 MHz, CDCl<sub>3</sub>)** δ 136.97, 136.51, 136.37, 135.36, 130.89, 129.07, 128.89, 128.74, 37.22, 30.56, 21.08, 20.87, 19.38.

**MS (EI):** *m/z* (%) = 270 (*M*<sup>+</sup>, 6), 105(13), 91 (100), 77 (23).

HR-MS HRMS (ACPI): *m/z* [*M*+Me<sub>3</sub>C<sub>6</sub>H<sub>2</sub>-CH<sub>2</sub>]<sup>+</sup> calculated for C<sub>28</sub>H<sub>35</sub>S: 403.2466, found: 403.2466.

**(4-Chlorobenzyl)(4-methylbenzyl)sulfane 2e<sup>[2]</sup>**

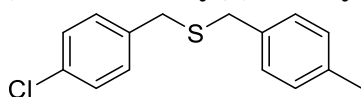

The compound **2e** was prepared as described in the general procedure **1** (colorless oil, 69 mg, 88 % isolated yield)

**<sup>1</sup>H NMR (400 MHz, CDCl<sub>3</sub>)** δ 7.30-7.26 (m, 2H), 7.24-7.19 (m, 2H), 7.19-7.11 (m, 4H), 3.56 (s, 2H), 3.55 (s, 2H), 2.34 (s, 3H).

**<sup>13</sup>C{<sup>1</sup>H} NMR (101 MHz, CDCl<sub>3</sub>)** δ 136.78, 136.70, 134.70, 132.66, 130.30, 129.18, 128.84, 128.56, 35.30, 34.83, 21.07.

**MS (EI):** *m/z* (%) = 264 (*M*<sup>+</sup>, 6), 262 (*M*<sup>+</sup>, 11), 105 (100), 91 (16).

**Benzyl(2-bromobenzyl)sulfane 2f<sup>[3]</sup>**

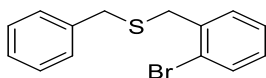

The compound **2f** was prepared as described in the general procedure **1** (colorless oil, 83 mg, 95 % isolated yield)

**<sup>1</sup>H NMR (400 MHz, CDCl<sub>3</sub>)** δ 7.58 (d, *J* = 7.9 Hz, 1H), 7.39-7.31 (m, 5H), 7.30-7.26 (m, 2H), 7.13 (td, *J* = 7.9, 1.7 Hz, 1H), 3.77 (s, 2H), 3.73 (s, 2H).

**<sup>13</sup>C{<sup>1</sup>H} NMR (101 MHz, CDCl<sub>3</sub>)** δ 137.90, 137.55, 133.12, 130.72, 128.98, 128.57, 128.51, 127.36, 127.05, 124.65, 36.22, 36.07.

**MS (EI):** *m/z* (%) = 293 (*M*<sup>+</sup>, 9), 291 (*M*<sup>+</sup>, 9), 105 (23), 91 (100).

**(4-Methylbenzyl)(4-(trifluoromethyl)benzyl)sulfane 2g**

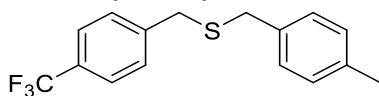

The compound **2g** was prepared as described in the general procedure **1** (colorless oil, 82 mg, 93 % isolated yield).

**<sup>1</sup>H NMR (400 MHz, CDCl<sub>3</sub>)** δ 7.56 (d, *J* = 8.0 Hz, 2H), 7.39 (d, *J* = 8.0 Hz, 2H), 7.16 d, *J* = 8.3 Hz, 2H), 7.12 (d, *J* = 8.3 Hz, 2H), 3.62 (s, 2H), 3.58 (s, 2H), 2.34 (s, 2H).

**$^{13}\text{C}\{^1\text{H}\}$  NMR (101 MHz,  $\text{CDCl}_3$ )**  $\delta$  142.52, 136.81, 134.53, 129.26, 129.22, 129.16, 128.85, 125.38, 125.34, 35.44, 35.08, 21.06.

**$^{19}\text{F}$  NMR (376 MHz,  $\text{CDCl}_3$ )**  $\delta$  -62.44.

**MS (EI):**  $m/z$  (%) = 296 ( $\text{M}^+$ , 12), 105(100), 91 (60).

**HRMS (ACPD):**  $m/z$  [ $\text{M} + \text{MeC}_6\text{H}_4\text{-CH}_2$ ] $^+$  calculated for  $\text{C}_{24}\text{H}_{24}\text{F}_3\text{S}$ : 401.1551, found: 401.1552.

#### Benzyl(1-phenylethyl)sulfane **2h**<sup>[4]</sup>

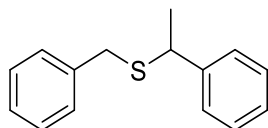

The compound **2h** was prepared as described in the general procedure **1** (colorless oil, 60 mg, 89 % isolated yield)

**$^1\text{H}$  NMR (400 MHz,  $\text{CDCl}_3$ )**  $\delta$  7.45-7.21 (m, 10H), 3.85 (q,  $J$  = 7.1 Hz, 1H), 3.59 (d,  $J$  = 13.5 Hz, 1H), 3.49 (d,  $J$  = 13.5 Hz, 1H), 1.58 (d,  $J$  = 7.1 Hz, 3H).

**$^{13}\text{C}\{^1\text{H}\}$  NMR (101 MHz,  $\text{CDCl}_3$ )**  $\delta$  143.81, 138.43, 128.87, 128.48, 128.38, 127.45, 127.06, 126.82, 43.57, 35.73, 22.54.

**MS (EI):**  $m/z$  (%) = 228 ( $\text{M}^+$ , 10), 105(100), 91 (55).

#### Benzyl(2-phenethyl)sulfane **2i**<sup>[5]</sup>

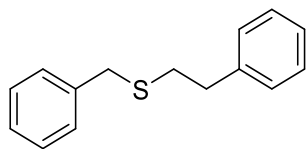

The compound **2i** was prepared as described in the general procedure **1** (colorless oil, 58 mg, 85 % isolated yield)

**$^1\text{H}$  NMR (400 MHz,  $\text{CDCl}_3$ )**  $\delta$  7.28-7.16 (m, 8H), 7.12-7.07 (m, 2H), 3.67 (s, 2H), 2.85-2.71 (m, 2H), 2.66-2.58 (m, 2H).

**$^{13}\text{C}\{^1\text{H}\}$  NMR (101 MHz,  $\text{CDCl}_3$ )**  $\delta$  140.54, 138.41, 128.87, 128.49, 128.43, 126.98, 126.31, 36.46, 36.04, 32.79.

**MS (EI):**  $m/z$  (%) = 228 ( $\text{M}^+$ , 7), 105(55), 91 (100), 77(12).

#### Benzyl(octyl)sulfane **2j**<sup>[6]</sup>

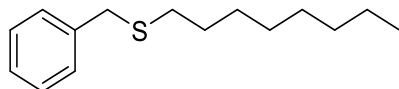

The compound **2j** was prepared as described in the general procedure **1** (colorless oil, 66 mg, 93 % isolated yield)

**$^1\text{H}$  NMR (400 MHz,  $\text{CDCl}_3$ )**  $\delta$  7.28-7.21 (m, 4H), 7.20-7.17 (m, 1H), 3.66 (s, 2H), 2.37 (t,  $J$  = 7.4 Hz, 2H), 1.54-1.48 (m, 2H), 1.24-1.21 (m, 10H), 0.84 (t,  $J$  = 6.8 Hz, 3H).

$^{13}\text{C}\{^1\text{H}\}$  NMR (101 MHz,  $\text{CDCl}_3$ )  $\delta$  138.69, 128.80, 128.41, 126.82, 36.31, 31.79, 31.42, 29.23, 29.16, 29.14, 28.87, 22.63, 14.06.

MS (EI):  $m/z$  (%) = 236 ( $\text{M}^+$ , 7), 91 (100), 77(16).

**Benzyl(isopropyl)sulfane 2k<sup>[7]</sup>**

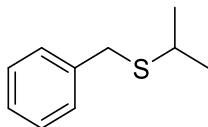

The compound **2k** was prepared as described in the general procedure **1** (colorless oil, 48 mg, 97 % isolated yield)

$^1\text{H}$  NMR (400 MHz,  $\text{CDCl}_3$ )  $\delta$  7.32-7.24 (m, 4H), 7.21-7.16 (m, 1H), 3.71 (s, 2H), 2.77 (hept,  $J$  = 6.6 Hz,  $^1\text{H}$ ), 1.22 (d,  $J$  = 6.6 Hz, 3H).

$^{13}\text{C}\{^1\text{H}\}$  NMR (101 MHz,  $\text{CDCl}_3$ )  $\delta$  138.78, 128.75, 128.43, 126.79, 35.16, 34.27, 23.12.

MS (EI):  $m/z$  (%) = 166 ( $\text{M}^+$ , 9), 91 (100), 77(23).

**Ethyl(phenyl)sulfane 2l<sup>[8]</sup>**

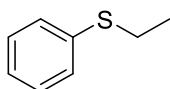

The compound **2l** was prepared as described in the general procedure **1** (colorless oil, 37 mg, 91 % isolated yield)

$^1\text{H}$  NMR (400 MHz,  $\text{CDCl}_3$ )  $\delta$  7.35-7.24 (m, 4H), 7.18-7.12 (m, 1H), 2.92 (q,  $J$  = 7.3 Hz, 2H), 1.29 (t,  $J$  = 7.3 Hz, 3H).

$^{13}\text{C}\{^1\text{H}\}$  NMR (101 MHz,  $\text{CDCl}_3$ )  $\delta$  136.62, 129.00, 128.78, 125.72, 27.62, 14.32.

MS (EI):  $m/z$  (%) = 138 ( $\text{M}^+$ , 100), 123(16), 77(23).

### 3. Ether oxide synthesis

#### 3.1. Typical procedure for thioester desulfurization (Procedure 2)

In a dry Schlenk tube, with a magnetic bar,  $\text{Fe}_2(\text{CO})_9$  (11.0 mg, 0.015 mmol, 10 mol%), thioester **4** (0.3 mmol, 1 equiv.), phenylsilane (97.2 mg, 0.9 mmol, 3 equiv.) and dry toluene (0.2 mL) were added successively under an argon atmosphere. Then, the mixture was stirred upon Blue LED-light irradiation ( $2 \times 24$  W, 450-460 nm) at ambient temperature. After 24 h, the reaction was quenched by adding NaOH (1M, 1 mL) and MeOH (1 mL) and stirred at ambient temperature for 2 h. Then, the mixture was extracted with dichloromethane and the organic layer was collected, dried with anhydrous  $\text{Na}_2\text{SO}_4$ , filtered and concentrated in vacuo. The residue was distilled using a Kugel Rohr bulb-to-bulb apparatus under vacuum, and then the pure ether product **5** was obtained after flash chromatography on silica eluting with petroleum ether and ethyl acetate (20:1 to 10:1).

### 3.2. Typical procedure for carboxylic ester deoxygenation (Procedure 3)

In a dry Schlenk tube, with a magnetic bar,  $\text{Fe}_2(\text{CO})_9$  (5.5 mg, 0.015 mmol, 5 mol%), carboxylic ester **6** (0.3 mmol, 1 equiv.), phenylsilane (97.2 mg, 0.9 mmol, 3 equiv.) and dry toluene (0.2 mL) were added successively under an argon atmosphere. Then, the mixture was stirred upon Blue LED-light irradiation ( $2 \times 24$  W, 450-460 nm) at ambient temperature. After 24 h, the reaction was quenched by adding NaOH (1M, 1 mL) and MeOH (1 mL) and stirred at ambient temperature for 2 h. Then, the mixture was extracted with dichloromethane and the organic layer was collected, dried with anhydrous  $\text{Na}_2\text{SO}_4$ , filtered and concentrated in vacuo. The residue was distilled using a Kugel Rohr bulb-to-bulb apparatus under vacuum, and then the pure ether product **5** was obtained after flash chromatography on silica eluting with petroleum ether and ethyl acetate (20:1 to 10:1).

### 3.3. Characterization of the ether oxides

#### (Butoxymethyl)benzene **5a**<sup>[9]</sup>

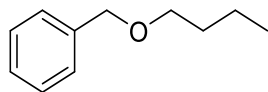

The compound **5a** was prepared as described in the general procedure **2** starting from S-*n*-butyl benzothioate (colorless oil, 44 mg, 91 % isolated yield)

The compound **5a** was also prepared as described in the general procedure **3** starting from *n*-butyl benzoate (colorless oil, 48 mg, 99 % isolated yield).

<sup>1</sup>H NMR (400 MHz,  $\text{CDCl}_3$ )  $\delta$  7.32-7.26 (m, 4H), 7.24-7.20 (m, 1H), 4.45 (s, 2H), 3.42 (t,  $J$  = Hz, 2H), 1.59-1.51 (m, 2H), 1.35 (sext,  $J$  = Hz, 2H), 0.87 (t,  $J$  = Hz, 3H).

<sup>13</sup>C{<sup>1</sup>H} NMR (101 MHz,  $\text{CDCl}_3$ )  $\delta$  138.76, 128.32, 127.59, 127.43, 72.85, 70.22, 31.85, 19.38, 13.91.

MS (EI):  $m/z$  (%) = 164 ( $\text{M}^+$ , 12), 91 (100), 77(19).

#### Dibenzylether **5b**<sup>[10]</sup>

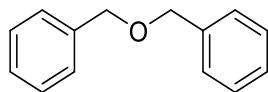

The compound **5b** was prepared as described in the general procedure **2** starting from S-benzyl benzothioate **1b** (colorless oil, 55 mg, 93 % isolated yield).

The compound **5b** was also prepared as described in the general procedure **3** starting from benzyl benzoate (colorless oil, 57 mg, 96 % isolated yield).

**<sup>1</sup>H NMR (400 MHz, CDCl<sub>3</sub>)** δ 7.42-7.34 (m, 8H), 7.32-7.20 (m, 2H), 4.58 (s, 4H).

**<sup>13</sup>C{<sup>1</sup>H} NMR (101 MHz, CDCl<sub>3</sub>)** δ 138.29, 128.39, 127.77, 127.62, 72.12.

**MS (EI):** m/z (%) = 198 (M<sup>+</sup>, 10), 91 (100), 77(25).

### 1-(Methoxymethyl)-4-methylbenzene **5c**<sup>[11]</sup>

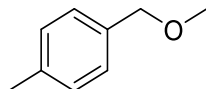

The compound **5c** was prepared as described in the general procedure **2** from S-methyl *p*-methylbenzothioate. (colorless oil, 36 mg, 90 % isolated yield)

**<sup>1</sup>H NMR (400 MHz, CDCl<sub>3</sub>)** δ 7.36 (d, *J* = 7.7 Hz, 2H), 7.21 (d, *J* = 7.7 Hz, 2H), 4.51 (s, 2H), 3.47-3.42 (m, 3H), 2.44 (s, 3H).

**<sup>13</sup>C{<sup>1</sup>H} NMR (101 MHz, CDCl<sub>3</sub>)** δ 137.21, 135.10, 128.98, 127.76, 74.50, 57.81, 21.06.

**MS (EI):** m/z (%) = 136 (M<sup>+</sup>, 13), 91 (100), 77(25).

### 1-Methoxy-2-(methoxymethyl)benzene **5d**<sup>[12]</sup>

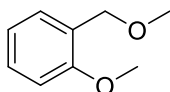

The compound **5d** was prepared as described in the general procedure **2** from S-methyl 2-methoxybenzothioate. (colorless oil, 37 mg, 83 % isolated yield)

**<sup>1</sup>H NMR (400 MHz, CDCl<sub>3</sub>)** δ 7.39-7.34 (m, 1H), 7.29-7.25 (m, 1H), 6.96 (t, *J* = 7.4 Hz, <sup>1</sup>H), 6.88 (d, *J* = 8.2 Hz, <sup>1</sup>H), 4.51 (s, 2H), 3.84 (s, 3H), 3.42 (s, 3H).

**<sup>13</sup>C{<sup>1</sup>H} NMR (101 MHz, CDCl<sub>3</sub>)** δ 157.22, 129.10, 128.73, 126.52, 120.40, 110.26, 69.55, 58.31, 55.38.

**MS (EI):** m/z (%) = 152 (M<sup>+</sup>, 13), 91 (100), 77(25).

### 1-Bromo-4-(methoxymethyl)benzene **5e**<sup>[11]</sup>

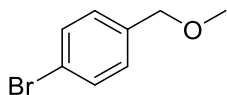

The compound **5e** was prepared as described in the general procedure **2** from S-methyl *p*-bromobenzothioate (colorless oil, 52 mg, 87 % isolated yield).

**<sup>1</sup>H NMR (400 MHz, CDCl<sub>3</sub>)** δ 7.47 (d, *J* = 8.4 Hz, 1H), 7.21 (d, *J* = 8.4 Hz, 1H), 4.40 (s, 1H), 3.38 (s, 2H).

**<sup>13</sup>C{<sup>1</sup>H} NMR (101 MHz, CDCl<sub>3</sub>)** δ 137.22, 131.44, 129.23, 121.42, 73.84, 58.12.

**MS (EI):** m/z (%) = 201 (M<sup>+</sup>, 9), 199 (M<sup>+</sup>, 9), 91 (100), 31(25).

### 1,3-Dihydroisobenzofuran **5f**<sup>[13]</sup>

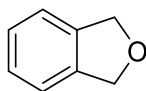

The compound **5f** was prepared as described in the general procedure **2** from isobenzofuran-1(3H)-thione (colorless oil, 33 mg, 93 % isolated yield)

The compound **5f** was prepared as described in the general procedure **3** from isobenzofuran-1(3H)-one (colorless oil, 33 mg, 93 % isolated yield)

**<sup>1</sup>H NMR (400 MHz, CDCl<sub>3</sub>)** δ 7.30 – 7.23 (m, 4H), 5.13 (s, 4H).

**<sup>13</sup>C{<sup>1</sup>H} NMR (101 MHz, CDCl<sub>3</sub>)** δ 139.04, 127.20, 120.92, 73.55.

**MS (EI):** m/z (%) = 120 (M<sup>+</sup>, 16), 91 (100), 65(12).

#### (Ethoxymethyl)benzene **5g**<sup>[11]</sup>

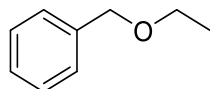

The compound **5g** was prepared as described in the general procedure **3** from S-ethyl benzothioate. (colorless oil, 39 mg, 99 % isolated yield)

**<sup>1</sup>H NMR (400 MHz, CDCl<sub>3</sub>)** δ 7.41-7.34 (m, 4H), 7.32-7.27 (m, 1H), 4.54 (s, 2H), 3.58 (d, *J* = 7.0 Hz, 2H), 1.29 (d, *J* = 7.0 Hz, 3H).

**<sup>13</sup>C{<sup>1</sup>H} NMR (101 MHz, CDCl<sub>3</sub>)** δ 138.58, 128.28, 127.59, 127.42, 72.64, 65.64, 15.16.

**MS (EI):** m/z (%) = 136 (M<sup>+</sup>, 13), 91 (100), 65(12).

#### (Benzyloxy)benzene **5h**<sup>[14]</sup>

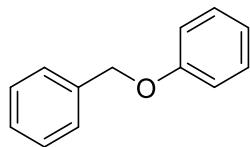

The compound **5h** was prepared as described in the general procedure **3** from S-phenyl benzothioate. (colorless oil, 45 mg, 83 % isolated yield)

**<sup>1</sup>H NMR (400 MHz, CDCl<sub>3</sub>)** δ 7.55-7.43 (m, 4H), 7.43-7.34 (m, 3H), 7.12-6.98 (m, 3H), 5.15 (s, 2H).

**<sup>13</sup>C{<sup>1</sup>H} NMR (101 MHz, CDCl<sub>3</sub>)** δ 158.81, 137.10, 129.47, 128.57, 127.92, 127.46, 120.93, 114.87, 69.93.

**MS (EI):** m/z (%) = 184 (M<sup>+</sup>, 12), 91 (100), 77(25).

## 4. Preparation of the starting thioamides (Procedure 4)

Before being able to study different experimental conditions for the reduction of thioester derivatives, it was first necessary to synthesize them. The chosen preparation method consisted of the reaction of acyl anhydrides with sodium thiosulfate pentahydrate, in the presence of halogenated derivatives.<sup>[15]</sup> (Scheme S1)

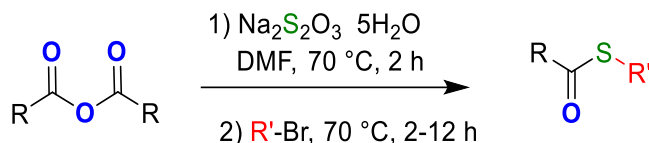

**Scheme S1:** Preparation of thioesters from acyl anhydrides

In a dry Schlenk tube, with a magnetic bar, to a solution of the organic anhydride (1.0 equiv.) in DMF (0.1 M) was added  $\text{Na}_2\text{S}_2\text{O}_3 \cdot 5\text{H}_2\text{O}$  (1.1 equiv.) and stirred at 70 °C under an argon atmosphere for several hours. Then, the organic halide (1.5 or 3.0 equiv.) in DMF was added to the reaction mixture (overall, 0.067 M) and stirred at 70 °C under an argon atmosphere. The resulting reaction mixture was stirred for several hours until the reaction was completed as indicated by TLC. The mixture was extracted with ether three times, and the combined organic layer was washed with brine, dried over  $\text{MgSO}_4$ , filtered and concentrated. The crude products were purified by flash column chromatography to afford the desired product. (petroleum ether / $\text{CH}_2\text{Cl}_2$ , 2:1 to 20:1)

#### S-(4-Methylbenzyl) benzothioate **1a**<sup>[16]</sup>

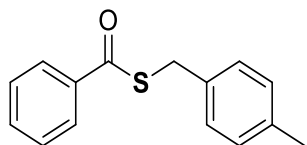

The compound **1a** was prepared as described in the general procedure **4**. (72 % isolated yield).

**<sup>1</sup>H NMR (400 MHz,  $\text{CDCl}_3$ )**  $\delta$  7.94 (m, 2H), 7.57 (m, 1H), 7.47-7.40 (m, 2H), 7.29 (d,  $J$  = 7.4 Hz, 2H), 7.13 (d,  $J$  = 7.4 Hz, 2H), 4.31 (s, 2H), 2.34 (s, 3H).

**<sup>13</sup>C{<sup>1</sup>H} NMR (101 MHz,  $\text{CDCl}_3$ )**  $\delta$  191.40, 137.03, 136.88, 134.35, 133.35, 129.33, 128.86, 128.58, 127.27, 33.12, 21.09.

**MS (EI):**  $m/z$  (%) = 242 ( $\text{M}^+$ , 10), 227 (7), 105 (43), 91 (100).

#### S-Benzyl benzothioate **1b**<sup>[16]</sup>

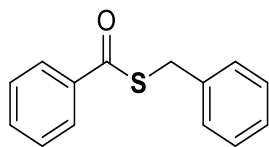

The compound **1b** was prepared as described in the general procedure **4**. (65 % isolated yield).

**<sup>1</sup>H NMR (400 MHz,  $\text{CDCl}_3$ )**  $\delta$  7.99-7.94 (m, 2H), 7.59 (m, 1H), 7.48-7.27 (m, 7H), 4.35 (s, 2H).

**<sup>13</sup>C{<sup>1</sup>H} NMR (101 MHz,  $\text{CDCl}_3$ )**  $\delta$  191.31, 137.46, 136.79, 133.44, 129.97, 128.65, 128.62, 127.32, 127.29, 33.33.

**MS (EI):**  $m/z$  (%) = 228 ( $\text{M}^+$ , 8), 137 (30), 105 (55), 91 (100).

#### S-(4-Methylbenzyl) 4-methoxybenzothioate **1c** NEW

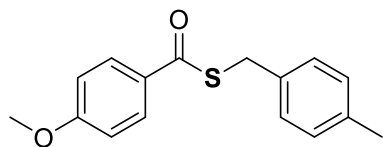

The compound **1c** was prepared as described in the general procedure **4**. (53 % isolated yield).

**<sup>1</sup>H NMR (400 MHz, CDCl<sub>3</sub>)** δ 8.17-8.07 (m, 2H), 7.33-7.27 (m, 2H), 7.17 (d, *J* = 8.0 Hz, 2H), 6.99-6.82 (m, 2H), 4.59 (s, 2H), 3.88 (s, 3H), 2.36 (s, 3H).

**<sup>13</sup>C{<sup>1</sup>H} NMR (101 MHz, CDCl<sub>3</sub>)** δ 189.92, 163.79, 136.95, 134.65, 129.77, 129.47, 129.31, 128.86, 113.77, 55.50, 32.98, 21.09.

**MS (EI):** *m/z* (%) = 272 (*M*<sup>+</sup>, 12), 257 (6), 105 (55), 91 (100).

#### S-(4-Methylbenzyl) 2,4,6-trimethylbenzothioate **1d** NEW

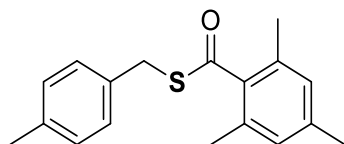

The compound **1d** was prepared as described in the general procedure **4**. (43 % isolated yield).

**<sup>1</sup>H NMR (400 MHz, CDCl<sub>3</sub>)** δ 7.38 (d, *J* = 7.9 Hz, 2H), 7.25 (d, *J* = 7.9 Hz, 2H), 6.96 (s, 2H), 4.41 (s, 2H), 2.47 (s, 3H), 2.41 (s, 3H), 2.39 (s, 6H).

**<sup>13</sup>C{<sup>1</sup>H} NMR (101 MHz, CDCl<sub>3</sub>)** δ 197.32, 139.27, 137.20, 136.93, 134.51, 133.75, 129.31, 128.73, 128.37, 33.66, 21.12, 21.10, 18.94.

**MS (EI):** *m/z* (%) = 284 (*M*<sup>+</sup>, 12), 147 (100), 65 (13).

#### S-(4-Methylbenzyl) 4-chlorobenzothioate **1e** NEW

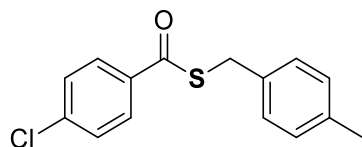

The compound **1e** was prepared as described in the general procedure **4**. (60 % isolated yield).

**<sup>1</sup>H NMR (400 MHz, CDCl<sub>3</sub>)** δ 7.95-7.90 (m, 2H), 7.47-7.40 (m, 2H), 7.31-7.25 (m, 2H), 7.15 (d, *J* = 7.9 Hz, 2H), 4.29 (s, 2H), 2.33 (s, 3H).

**<sup>13</sup>C{<sup>1</sup>H} NMR (101 MHz, CDCl<sub>3</sub>)** δ 190.24, 139.76, 137.17, 135.22, 134.06, 129.37, 128.90, 128.85, 128.61, 33.25, 21.10.

**MS (EI):** *m/z* (%) = 278 (*M*<sup>+</sup>, 5), 276 (*M*<sup>+</sup>, 12), 139 (100), 105 (16).

#### S-(2-Bromobenzyl) benzothioate **1f**<sup>[16]</sup>

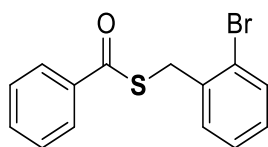

The compound **1f** was prepared as described in the general procedure **4**. (40 % isolated yield).

**<sup>1</sup>H NMR (400 MHz, CDCl<sub>3</sub>)** δ 7.99-7.95 (m, 2H), 7.60-7.53 (m, 3H), 7.44 (t, *J* = 7.8 Hz, 2H), 7.29-7.24 (m, 1H), 7.13 (td, *J* = 7.8, 1.7 Hz, 1H), 4.47 (s, 2H).

**<sup>13</sup>C{<sup>1</sup>H} NMR (101 MHz, CDCl<sub>3</sub>)** δ 191.12, 137.11, 136.70, 133.50, 132.88, 131.37, 129.06, 128.63, 127.68, 127.31, 124.65, 33.85.

**MS (EI):** *m/z* (%) = 307 (*M*<sup>+</sup>, 9), 305 (*M*<sup>+</sup>, 10), 105 (60), 91 (100).

#### S-(4-Methylbenzyl) 4-(trifluoromethyl)benzothioate **1g** NEW

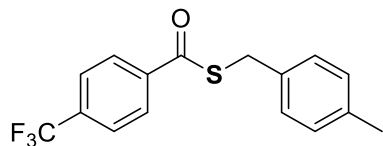

The compound **1g** was prepared as described in the general procedure **4**. (57 % isolated yield).

**<sup>1</sup>H NMR (400 MHz, CDCl<sub>3</sub>)** δ 8.09 (d, *J* = 8.2 Hz, 2H), 7.74 (d, *J* = 8.2 Hz, 2H), 7.27 (d, *J* = 7.7 Hz, 2H), 7.14 (d, *J* = 7.7 Hz, 2H), 4.32 (s, 2H), 2.34 (s, 3H).

**<sup>13</sup>C{<sup>1</sup>H} NMR (101 MHz, CDCl<sub>3</sub>)** δ 190.50, 139.63, 137.30, 134.66 (q, *J* = 32.7 Hz), 133.78, 129.41, 128.87, 127.61, 125.67 (q, *J* = 3.8 Hz), 123.51 (q, *J* = 272.8 Hz), 33.42, 21.10.

**<sup>19</sup>F NMR (376 MHz, CDCl<sub>3</sub>)** δ -63.13.

**MS (EI):** *m/z* (%) = 310 (*M*<sup>+</sup>, 12), 105 (25), 91 (100).

#### S-(1-Phenylethyl) benzothioate **1h**<sup>[17]</sup>

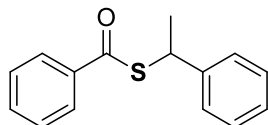

The compound **1h** was prepared as described in the general procedure **4**. (69 % isolated yield).

**<sup>1</sup>H NMR (400 MHz, CDCl<sub>3</sub>)** δ 7.99-7.91 (m, 2H), 7.59-7.51 (m, 1H), 7.48-7.22 (m, 7H), 4.96 (q, *J* = 7.1 Hz, 1H), 1.77 (d, *J* = 7.1 Hz, 3H).

**<sup>13</sup>C{<sup>1</sup>H} NMR (101 MHz, CDCl<sub>3</sub>)** δ 191.17, 142.65, 136.97, 133.31, 128.62, 128.56, 127.36, 127.23, 43.04, 22.37.

**MS (EI):** *m/z* (%) = 242 (*M*<sup>+</sup>, 9), 227 (18), 105 (100), 77 (22).

#### S-Phenethyl benzothioate **1i**<sup>[16,18]</sup>

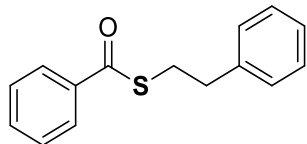

The compound **1i** was prepared as described in the general procedure **4**. (47 % isolated yield).

**<sup>1</sup>H NMR (400 MHz, CDCl<sub>3</sub>)** δ 8.01-7.94 (m, 2H), 7.62-7.53 (m, 1H), 7.50-7.41 (m, 2H), 7.38-7.20 (m, 5H), 3.37-3.29 (m, 2H), 3.02-2.94 (m, 2H).

**$^{13}\text{C}\{^1\text{H}\}$  NMR (101 MHz,  $\text{CDCl}_3$ )**  $\delta$  191.83, 140.07, 137.14, 133.33, 128.64, 128.59, 128.53, 127.21, 126.53, 35.93, 30.43.

**MS (EI):**  $m/z$  (%) = 242 ( $\text{M}^+$ , 10), 227 (6), 105 (100).

**S-Octyl benzothioate 1j<sup>[18]</sup>**

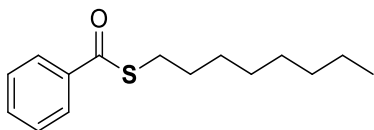

The compound **1j** was prepared as described in the general procedure **4**. (59 % isolated yield).

**$^1\text{H}$  NMR (400 MHz,  $\text{CDCl}_3$ )**  $\delta$  8.05-7.96 (m, 2H), 7.61-7.41 (m, 1H), 7.48-7.41 (m, 2H), 3.09 (t,  $J$  = 7.0 Hz, 2H), 1.7 (m, 2H), 1.51-1.25 (m, 10H), 0.91 (t,  $J$  = 7.0 Hz, 3H).

**$^{13}\text{C}\{^1\text{H}\}$  NMR (101 MHz,  $\text{CDCl}_3$ )**  $\delta$  191.93, 137.27, 133.07, 128.45, 127.11, 31.75, 29.53, 29.08, 28.99, 29.0, 28.90, 22.58, 14.01.

**MS (EI):**  $m/z$  (%) = 250 ( $\text{M}^+$ , 6), 121 (100), 77(16).

**S-Isopropyl benzothioate 1k<sup>[18]</sup>**

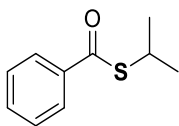

The compound **1k** was prepared as described in the general procedure **4**. (48 % isolated yield).

**$^1\text{H}$  NMR (400 MHz,  $\text{CDCl}_3$ )**  $\delta$  7.98-7.91 (m, 2H), 7.59-5.51 (m, 1H), 7.48-7.39 (m, 2H), 3.86 (sept,  $J$  = 6.8 Hz, 1H), 1.41 (d,  $J$  = 6.8 Hz, 6H).

**$^{13}\text{C}\{^1\text{H}\}$  NMR (101 MHz,  $\text{CDCl}_3$ )**  $\delta$  192.12, 137.38, 133.14, 128.52, 127.11, 34.90, 33.13.

**MS (EI):**  $m/z$  (%) = 180 ( $\text{M}^+$ , 6), 121 (100), 77(13).

**S-Phenyl ethanethioate 1l<sup>[19]</sup>**

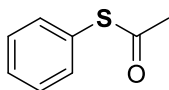

The compound **1l** was prepared as described in the general procedure **4**. (62 % isolated yield).

**$^1\text{H}$  NMR (400 MHz,  $\text{CDCl}_3$ )**  $\delta$  7.29-7.23 (m, 5H), 2.26 (s, 3H).

**$^{13}\text{C}\{^1\text{H}\}$  NMR (101 MHz,  $\text{CDCl}_3$ )**  $\delta$  193.91, 134.39, 129.37, 129.14, 127.93, 30.12.

**MS (EI):**  $m/z$  (%) = 152 ( $\text{M}^+$ , 12), 110 (100), 77(20).

5.  $^1\text{H}$  NMR  $^{13}\text{C}\{^1\text{H}\}$  NMR and  $^{19}\text{F}$  NMR spectra of the compounds

Benzyl(4-methylbenzyl)sulfane 2a

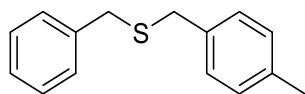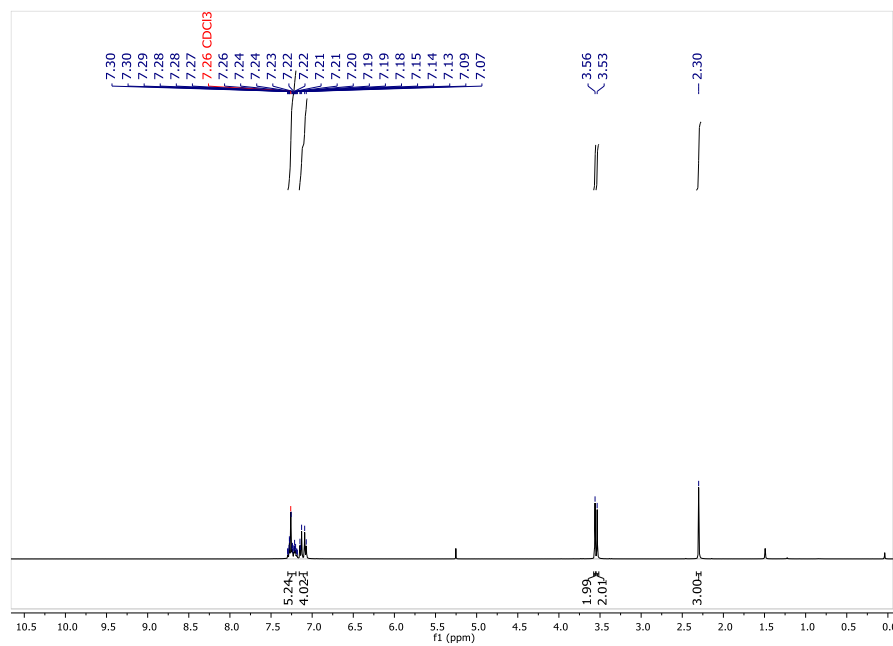

Figure S1 –  $^1\text{H}$ -NMR of 2a

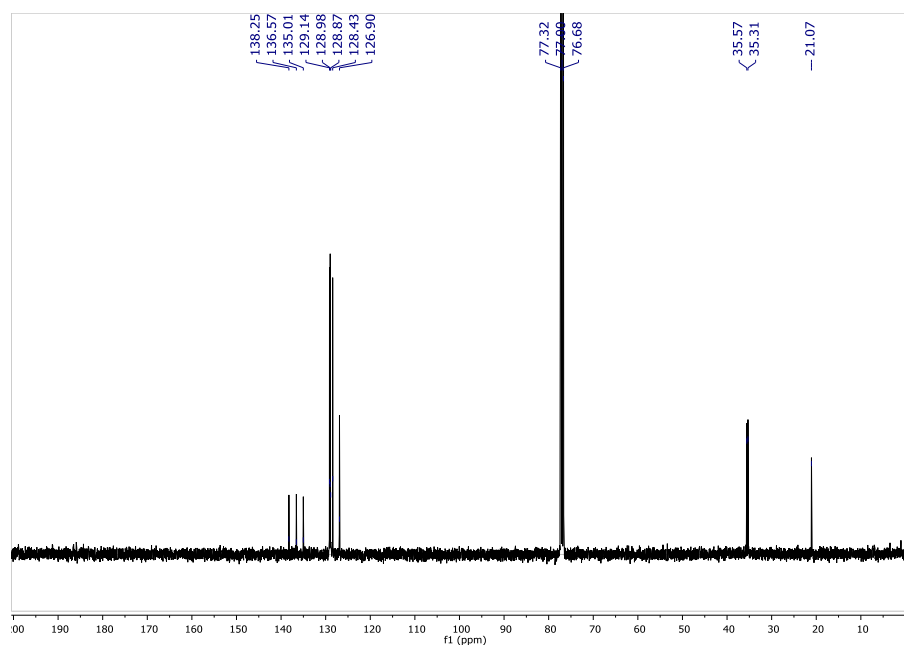

Figure S2 –  $^{13}\text{C}\{^1\text{H}\}$ -NMR of 2a

**Dibenzylsulfane 2b**

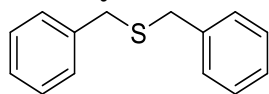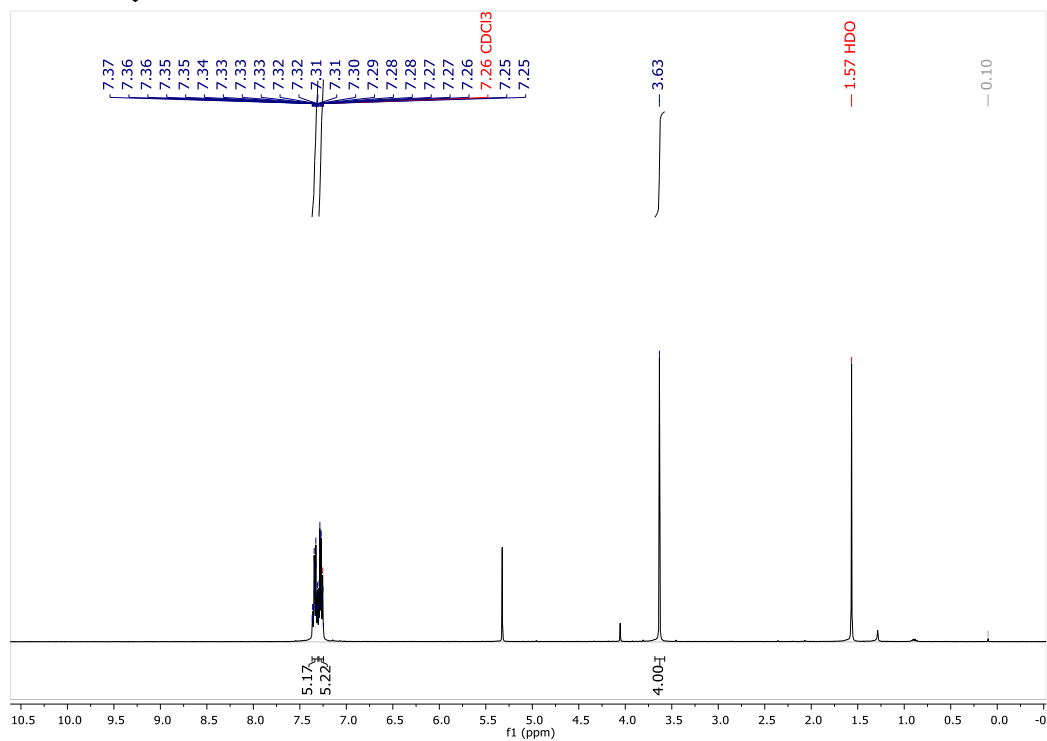

Figure S3 – <sup>1</sup>H-NMR of **2b**

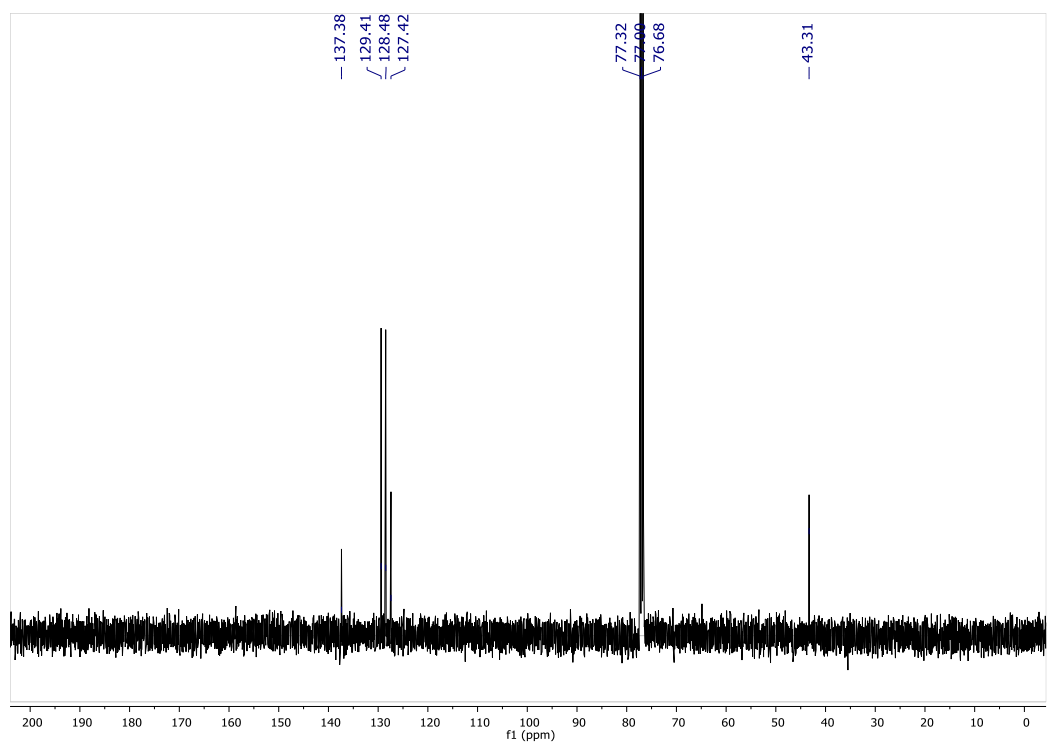

Figure S4 – <sup>13</sup>C{<sup>1</sup>H}-NMR of **2b**

**(4-Methoxybenzyl)(4-methylbenzyl)sulfane 2c**

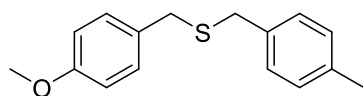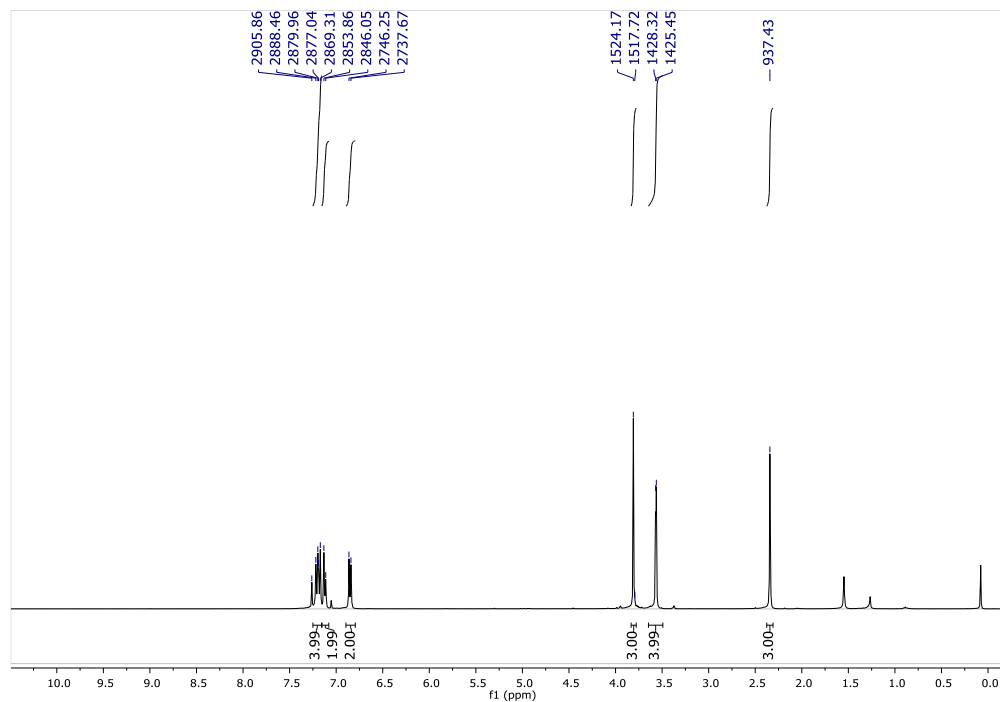

Figure S5 – <sup>1</sup>H-NMR of 2c

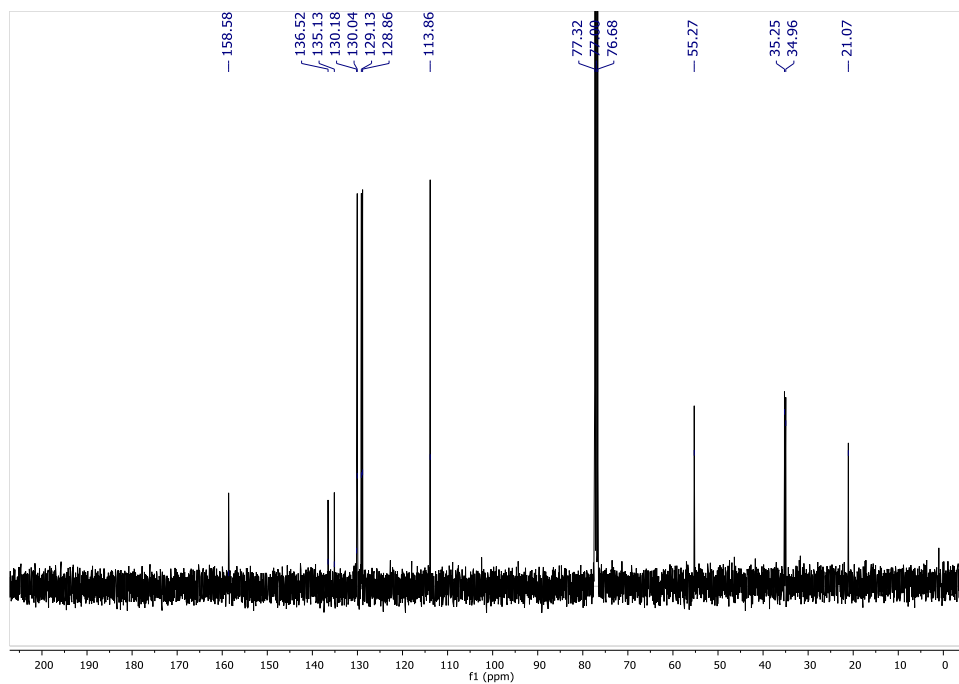

Figure S6 – <sup>13</sup>C{<sup>1</sup>H}-NMR of 2c

**(4-Methylbenzyl)(2,4,6-trimethylbenzyl)sulfane 2d**

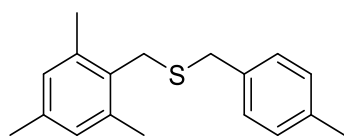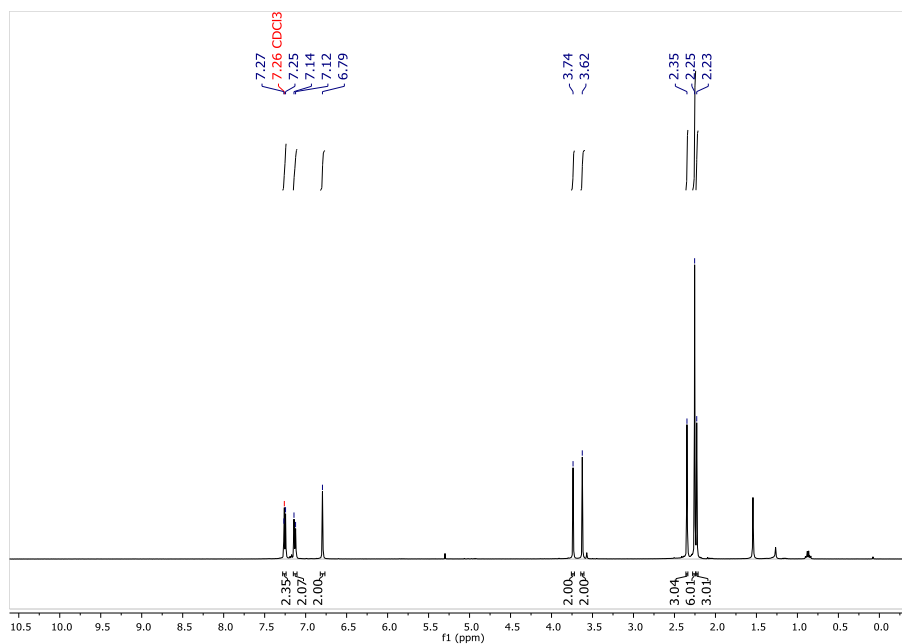

Figure S7 –  $^1\text{H}$ -NMR of 2d

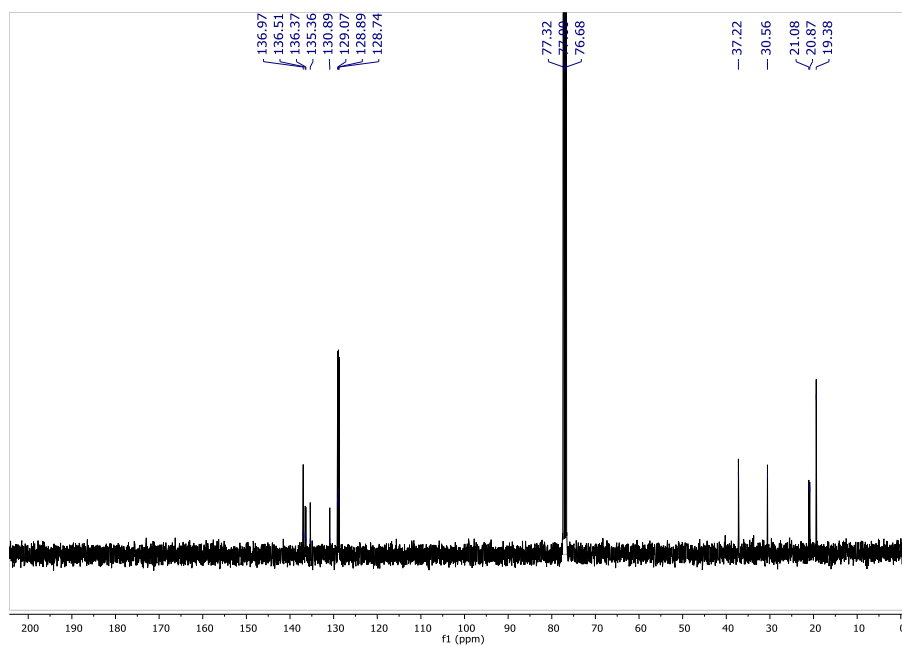

Figure S8 –  $^{13}\text{C}\{^1\text{H}\}$ -NMR of 2d

**(4-Chlorobenzyl)(4-methylbenzyl)sulfane 2e**

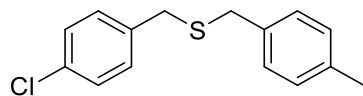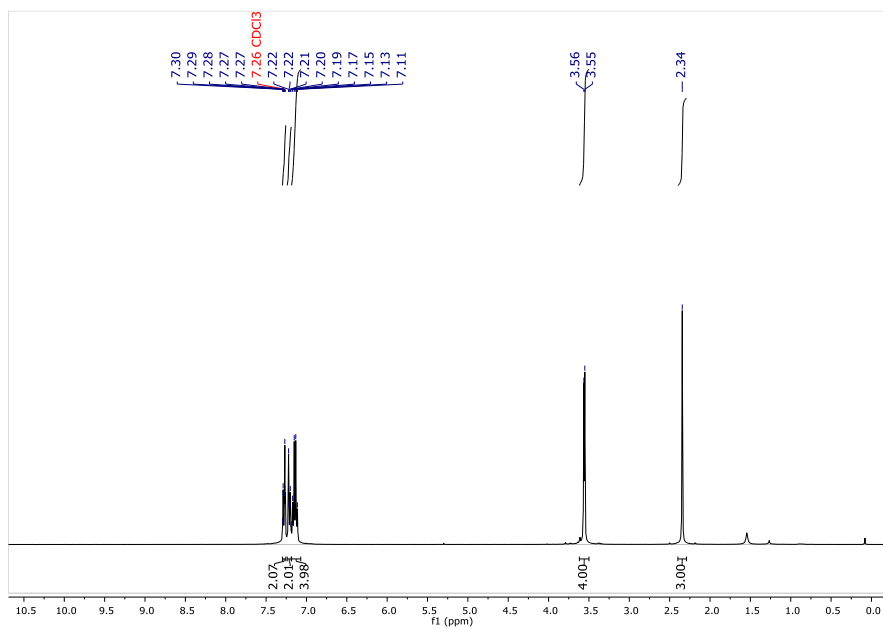

Figure S9 – <sup>1</sup>H-NMR of 2e

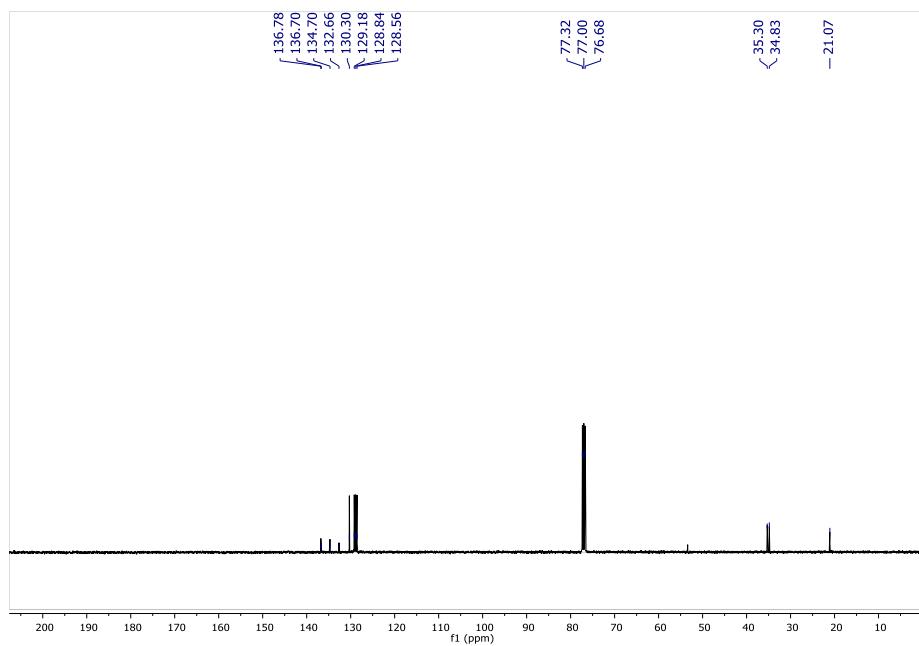

Figure S10 – <sup>13</sup>C{<sup>1</sup>H}-NMR of 2e

benzyl(2-bromobenzyl)sulfane **2f**

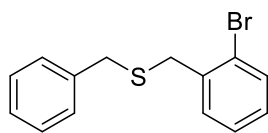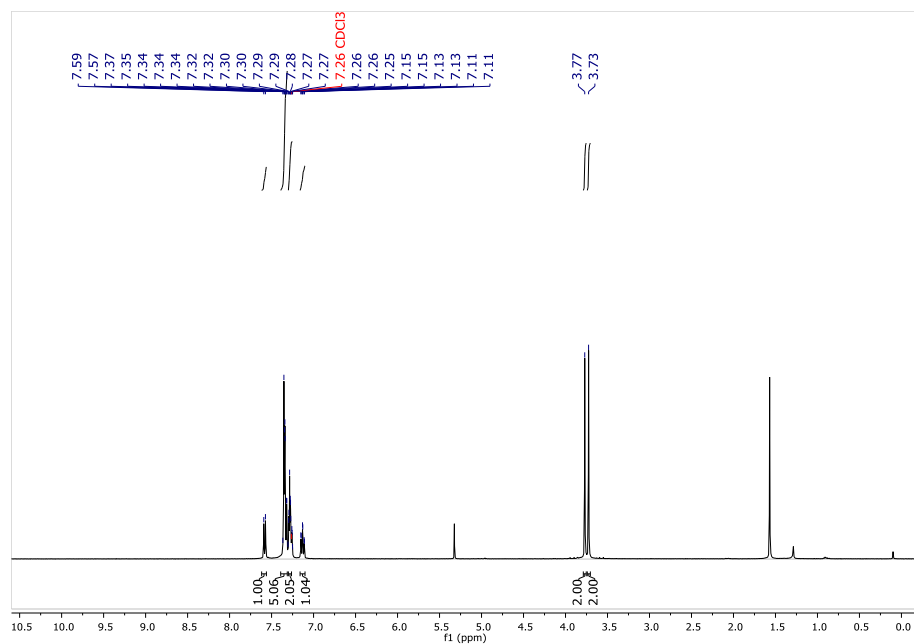

Figure S11 – <sup>1</sup>H-NMR of **2f**

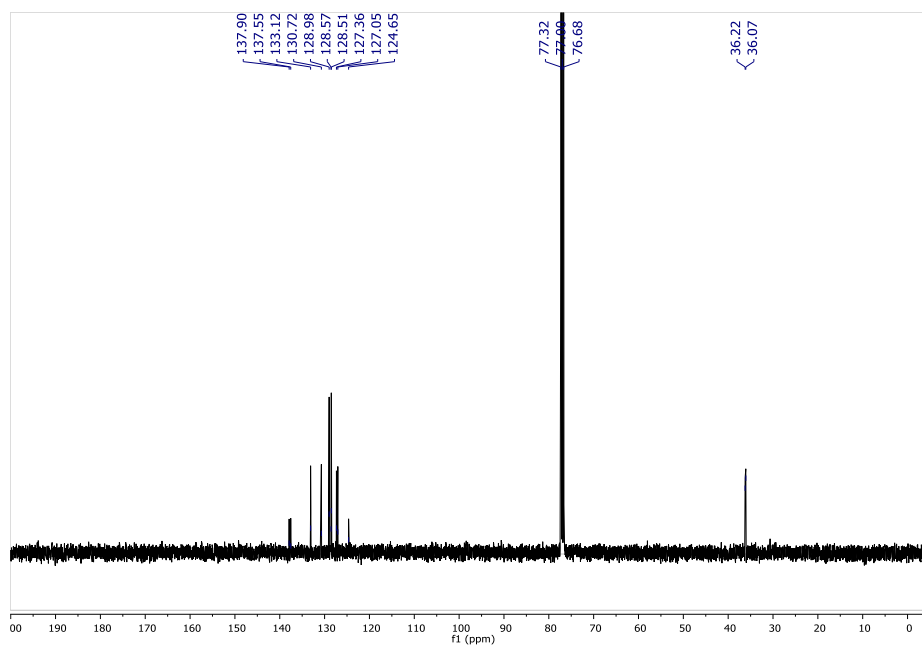

Figure S12 – <sup>13</sup>C{<sup>1</sup>H}-NMR of **2f**

**(4-Methylbenzyl)(4-(trifluoromethyl)benzyl)sulfane 2g**

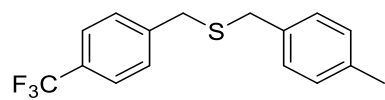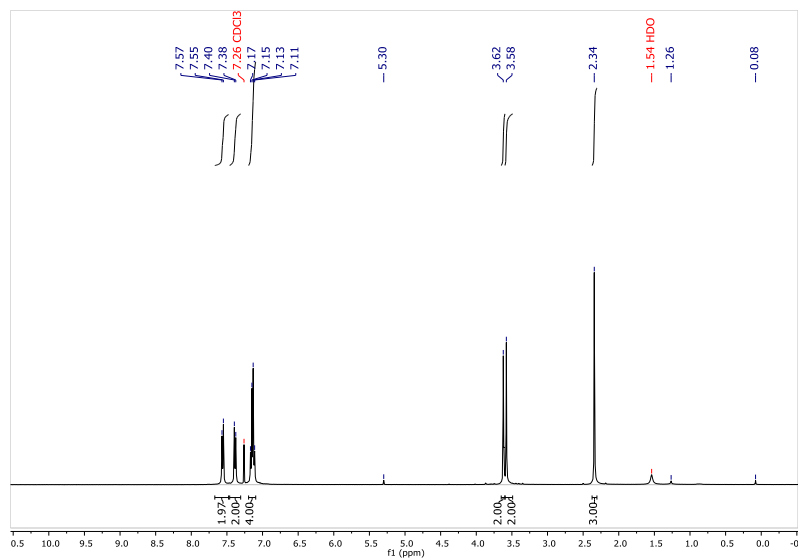

Figure S13 – <sup>1</sup>H-NMR of **2g**

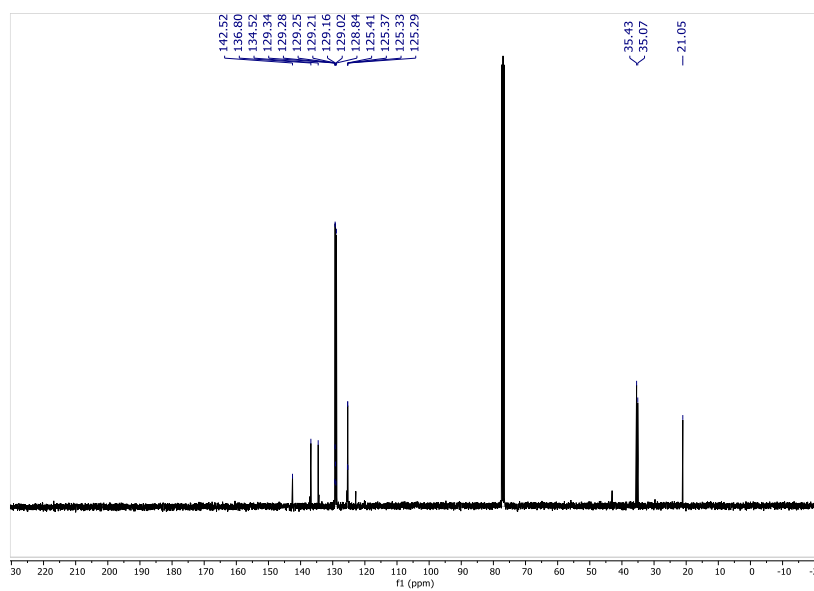

Figure S14 – <sup>13</sup>C{<sup>1</sup>H}-NMR of **2g**

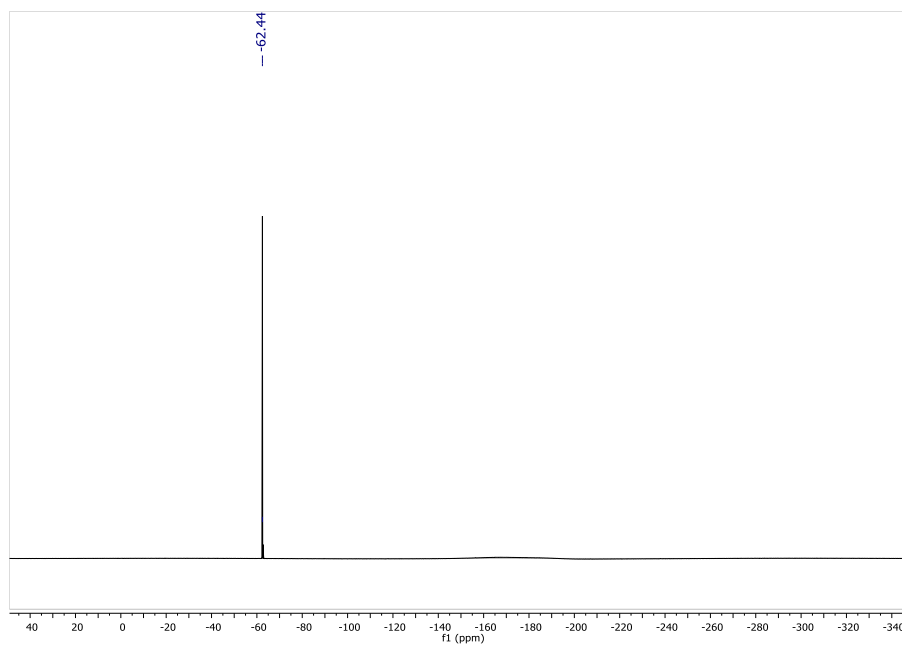

Figure S15 –  $^{19}\text{F}$ -NMR of **2g**

### Benzyl(1-phenylethyl)sulfane **2h**

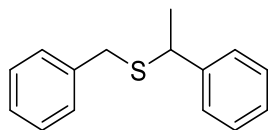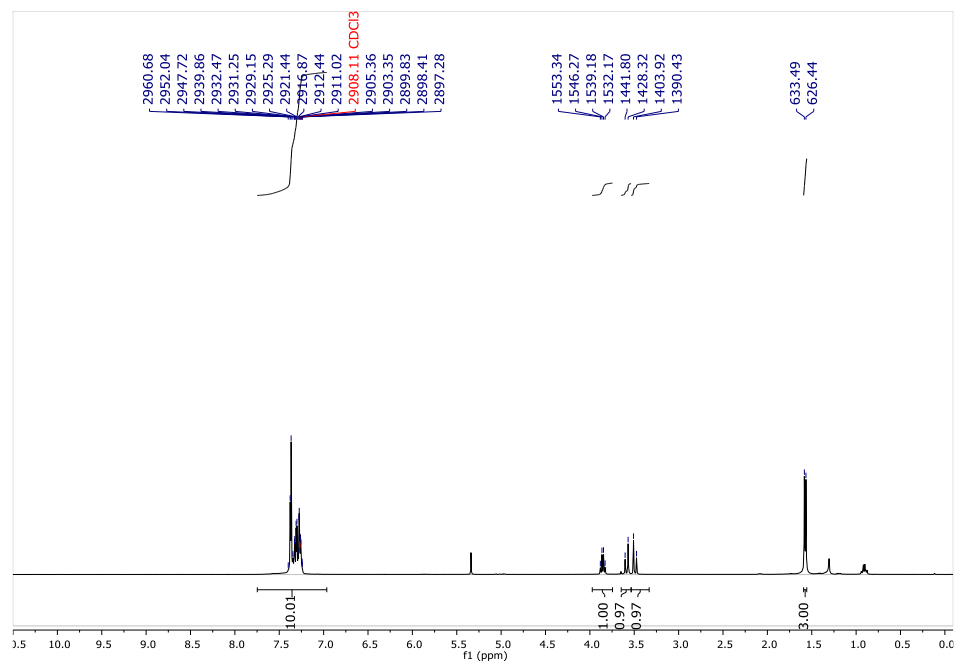

Figure S16 –  $^1\text{H}$ -NMR of **2h**

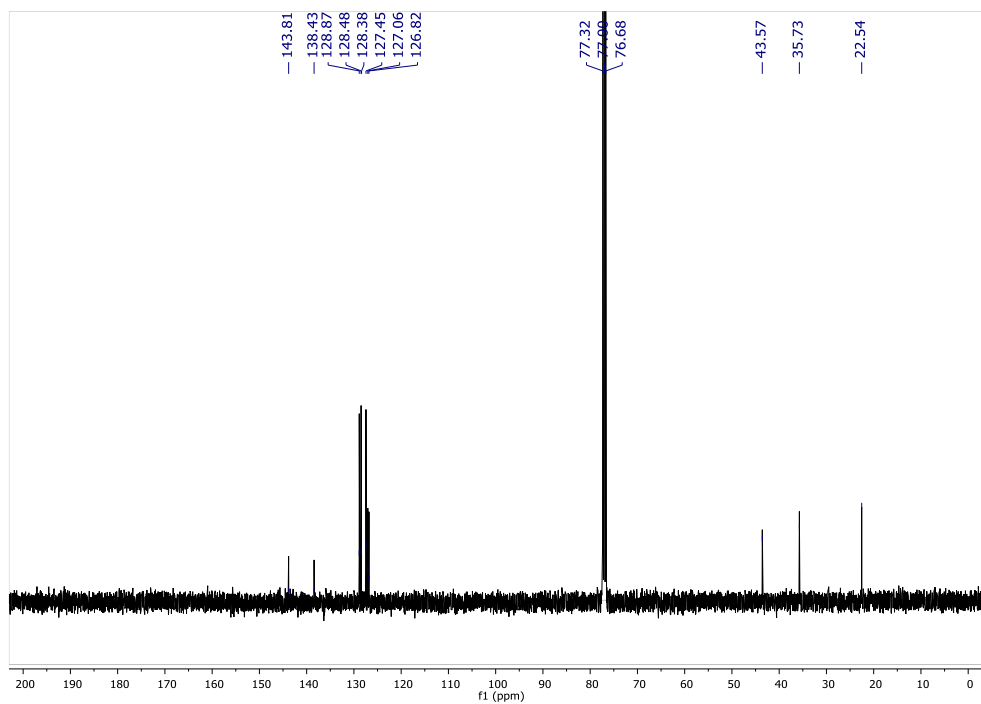

Figure S17 –  $^{13}\text{C}\{^1\text{H}\}$ -NMR of **2h**

### Benzyl(phenethyl)sulfane **2i**

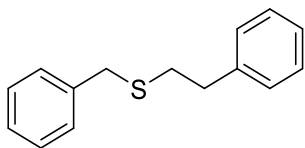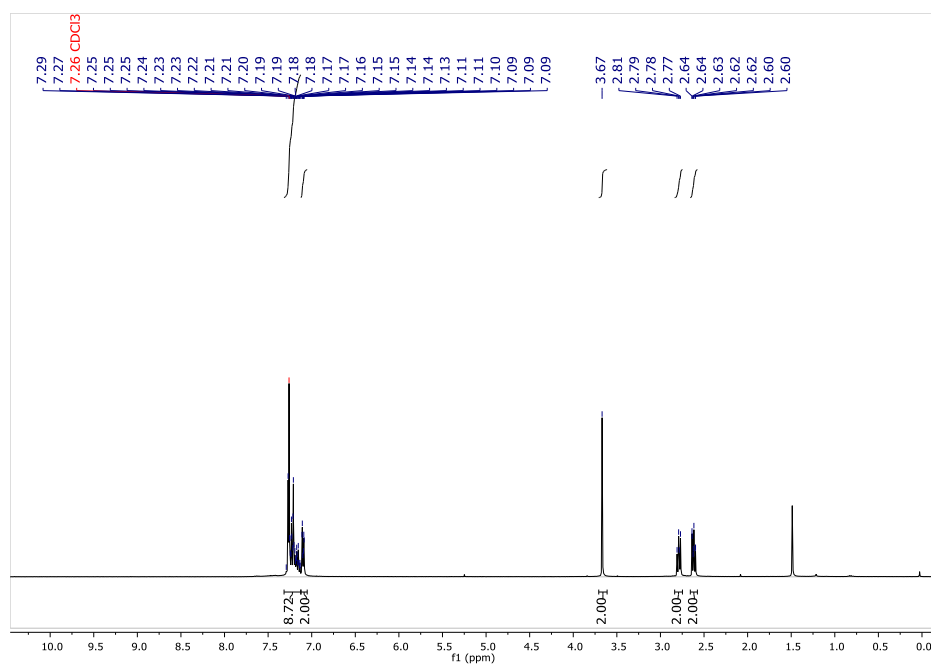

Figure S18 –  $^1\text{H}$ -NMR of **2i**

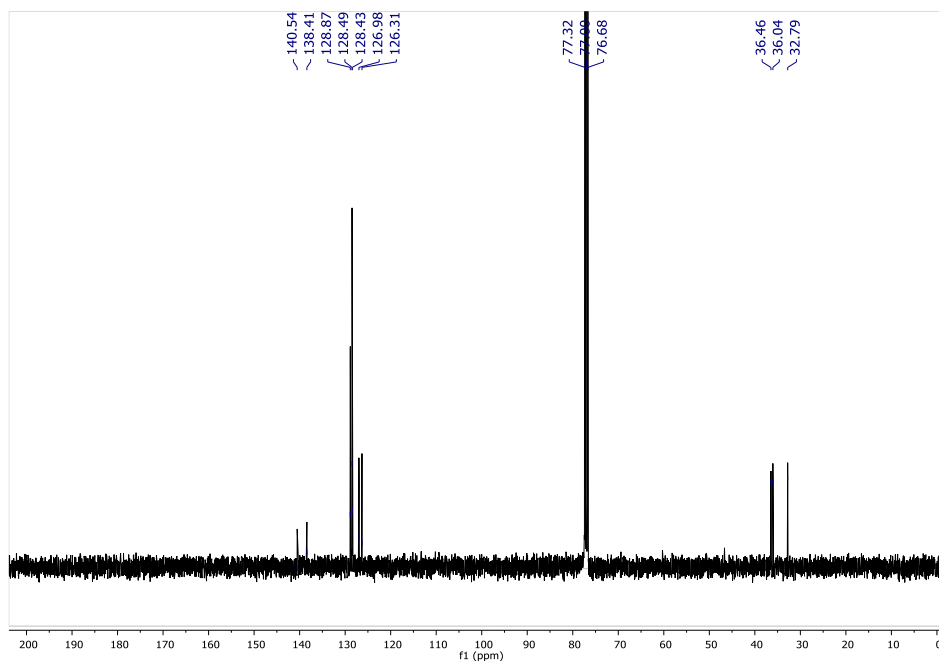

Figure S19 –  $^{13}\text{C}\{^1\text{H}\}$ -NMR of **2i**

**benzyl(octyl)sulfane **2j****

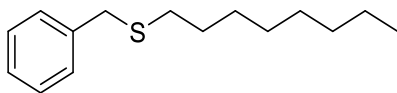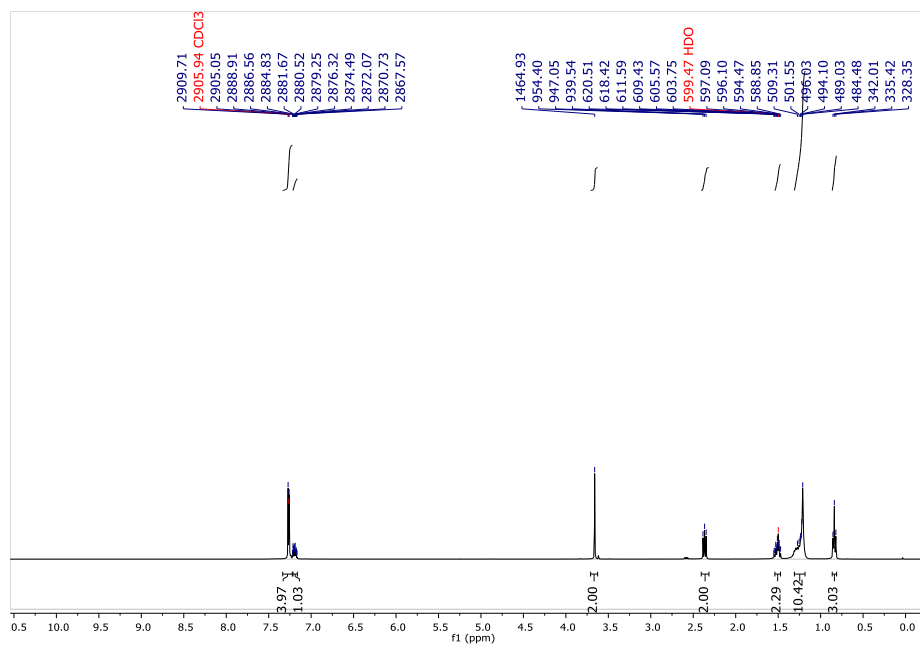

Figure S20 –  $^1\text{H}$ -NMR of **2j**

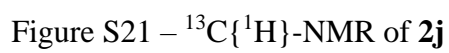

Chemical structure of 1-phenylpropane-1-thiol: A benzene ring is connected to a CH<sub>2</sub> group, which is in turn connected to a CH group bonded to a methyl group and a thiol group (-SH).

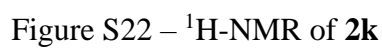

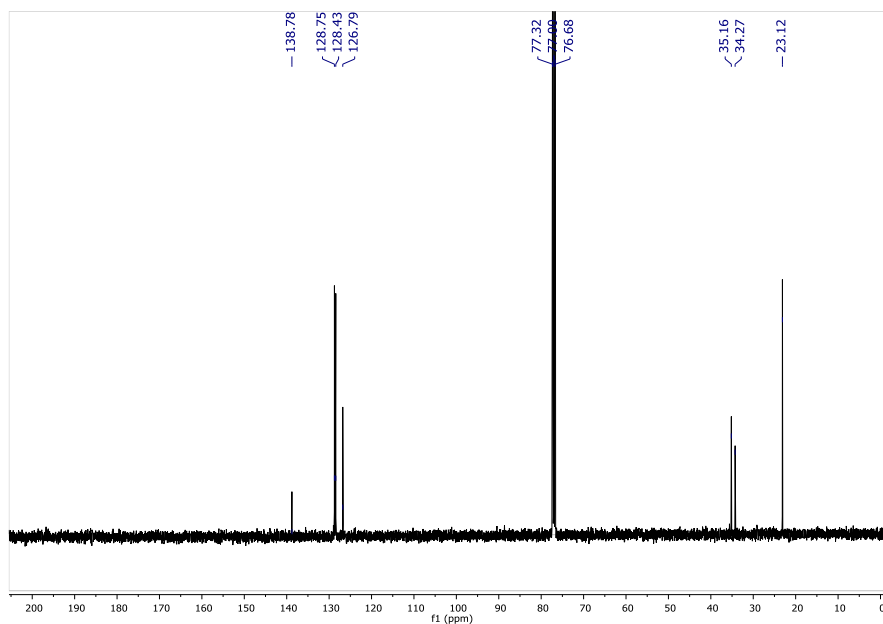

Figure S23 –  $^{13}\text{C}\{^1\text{H}\}$ -NMR of **2k**

### Ethyl(phenyl)sulfane **2l**

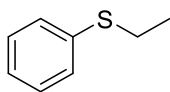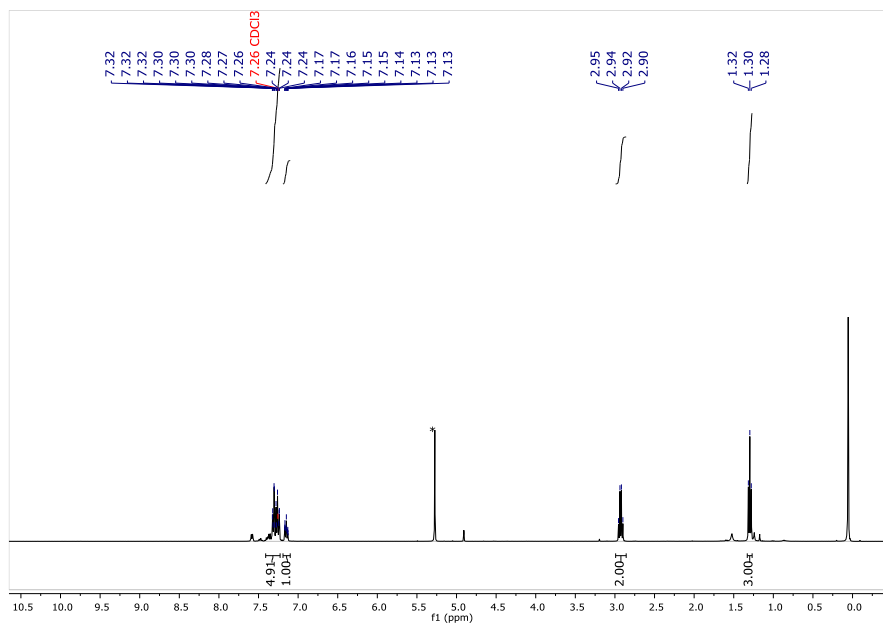

Figure S24 –  $^1\text{H}$ -NMR of **2l**. \*  $\text{CH}_2\text{Cl}_2$  (difficult to eliminate due to volatility of **2l**).

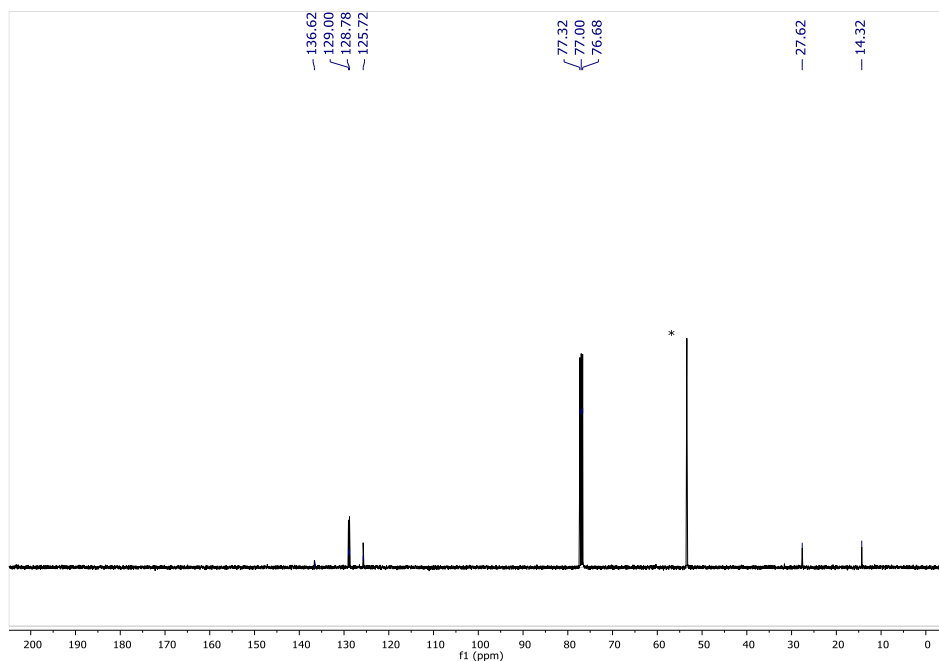

Figure S25 –  $^{13}\text{C}\{^1\text{H}\}$ -NMR of **2l**. \*  $\text{CH}_2\text{Cl}_2$  difficult to eliminate due to volatility of **2l**).

\*

### (Butoxymethyl)benzene **5a**

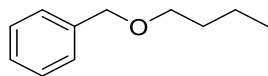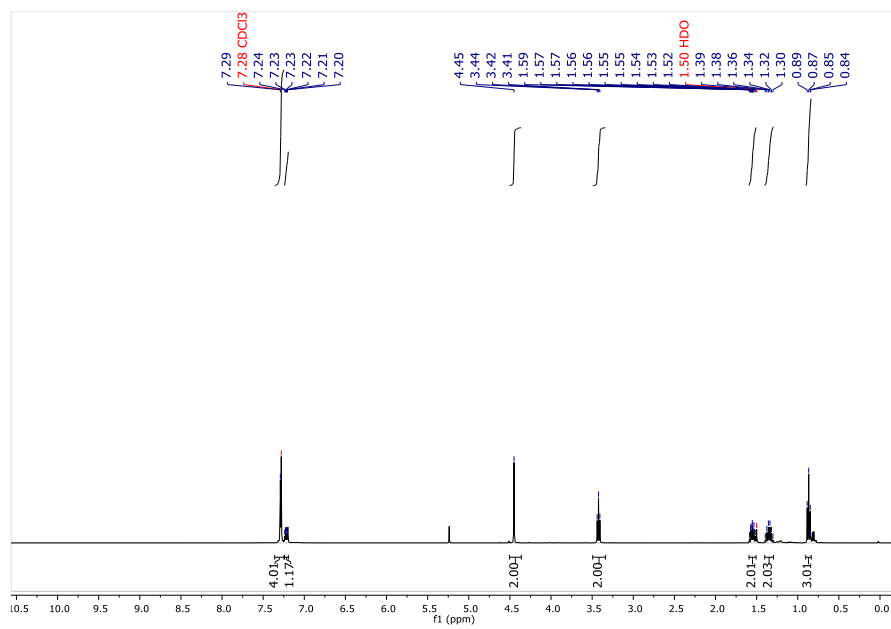

Figure S26 –  $^1\text{H}$ -NMR of **5a**

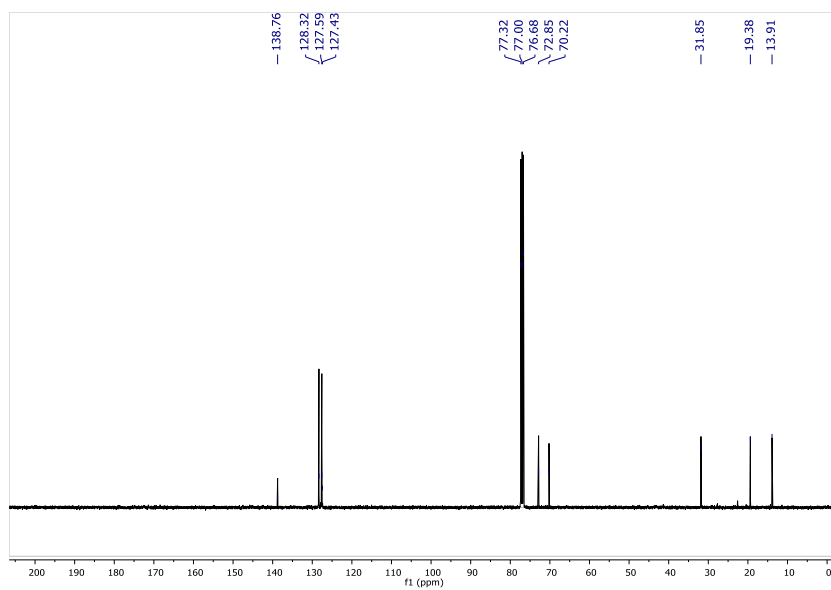

Figure S27 –  $^{13}\text{C}\{^1\text{H}\}$ -NMR of **5a**

**Dibenzyl ether 5a**

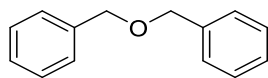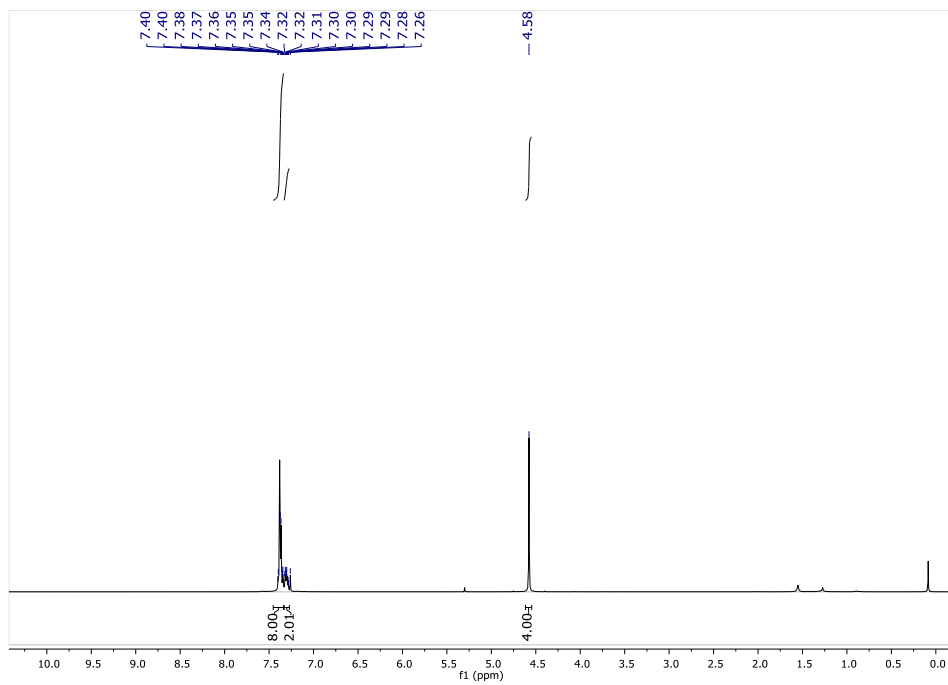

Figure S28 –  $^1\text{H}$ -NMR of **5b**

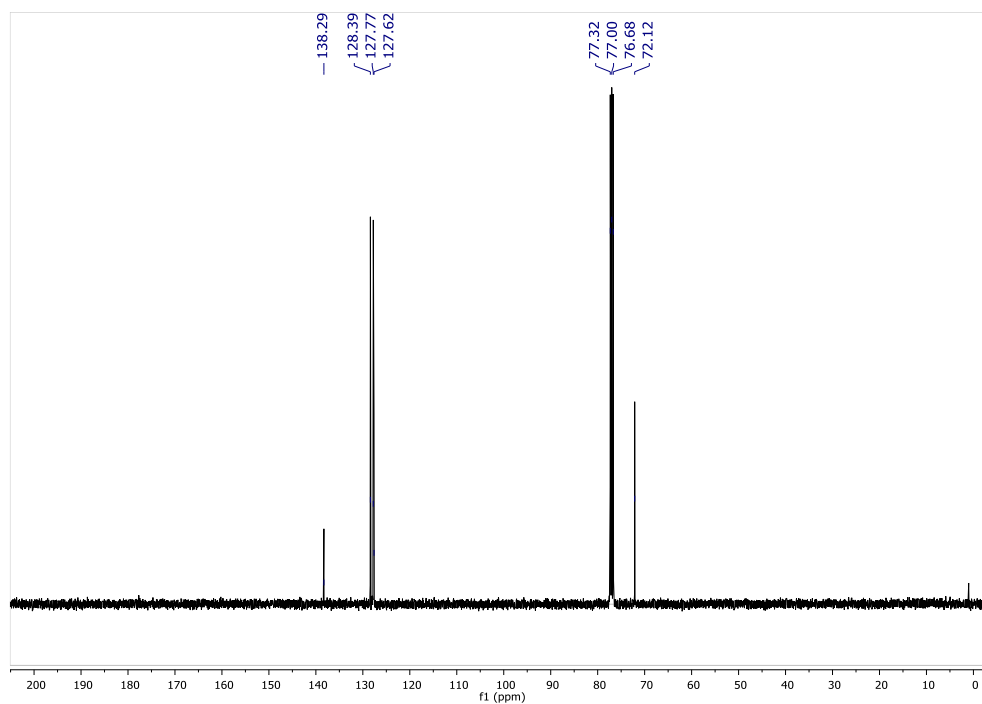

Figure S29 –  $^{13}\text{C}\{^1\text{H}\}$ -NMR of **5b**

**1-(Methoxymethyl)-4-methylbenzene 5c**

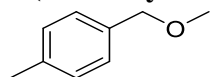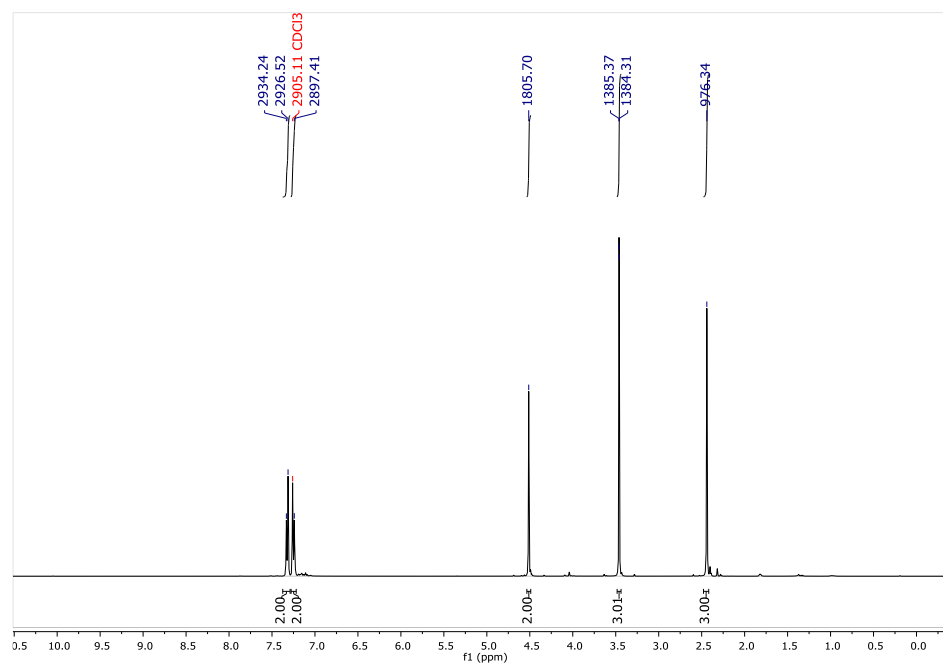

Figure S30 –  $^1\text{H}$ -NMR of **5c**

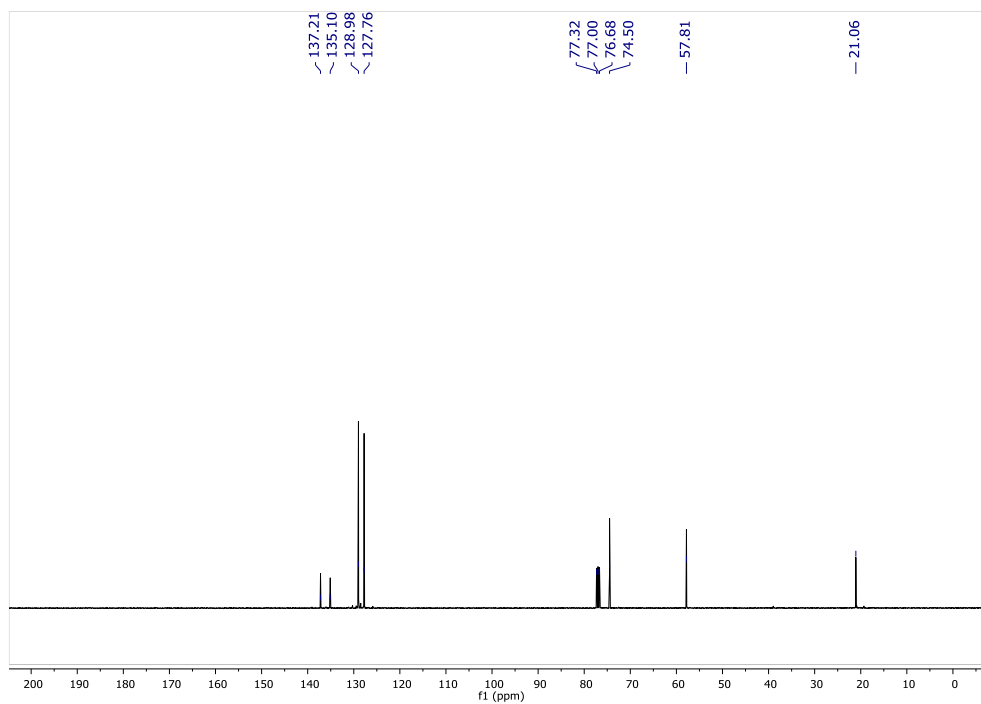

Figure S31 –  $^{13}\text{C}\{^1\text{H}\}$ -NMR of **5c**

### 1-Methoxy-2-(methoxymethyl)benzene **5d**

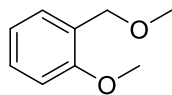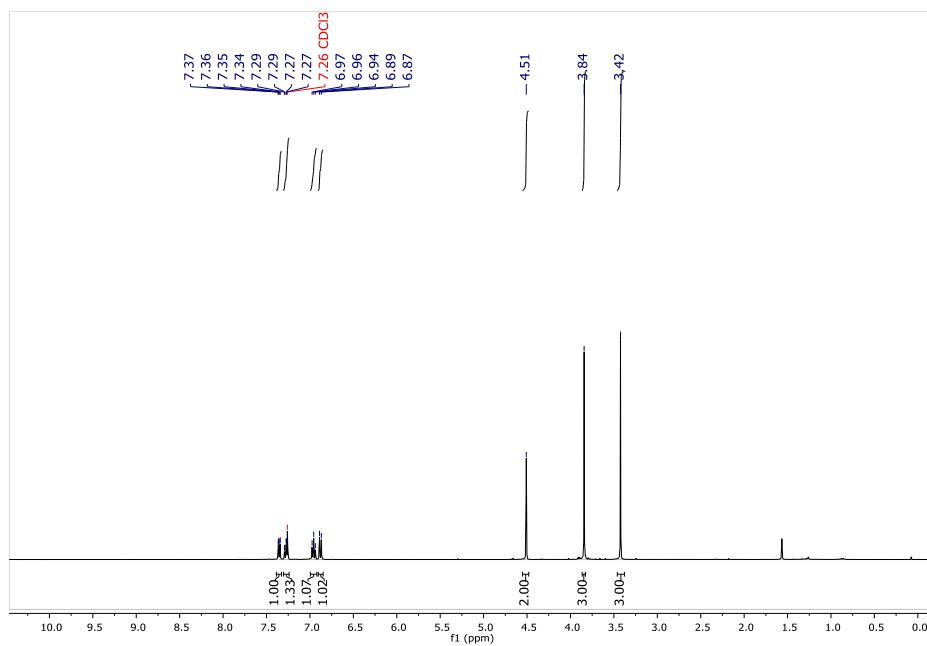

Figure S32 –  $^1\text{H}$ -NMR of **5d**

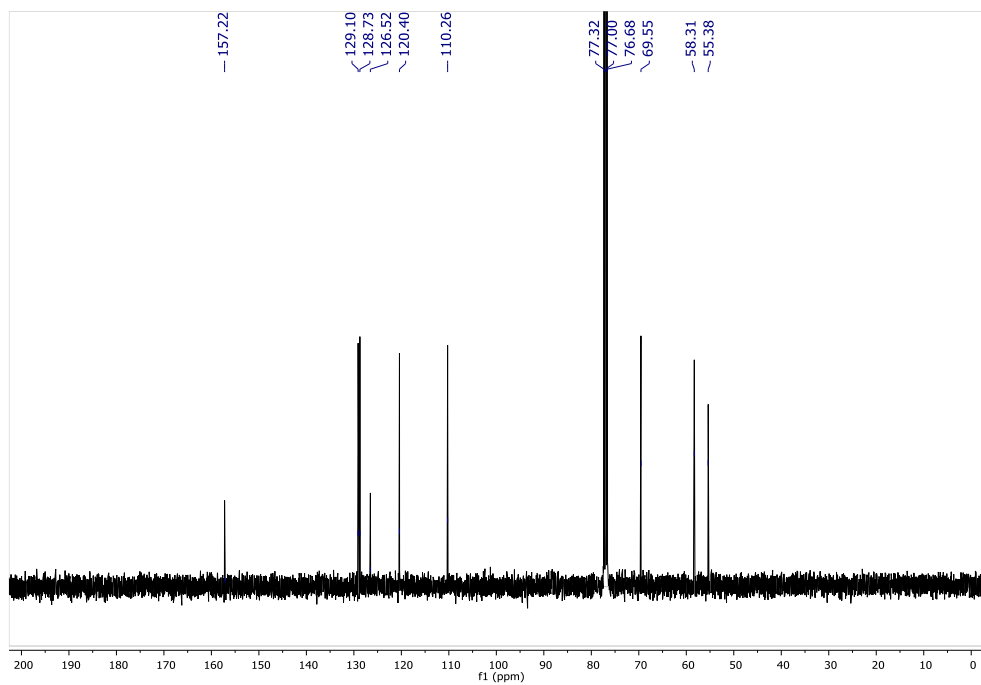

Figure S33 –  $^{13}\text{C}\{^1\text{H}\}$ -NMR of **5d**

**1-Bromo-4-(methoxymethyl)benzene **5e****

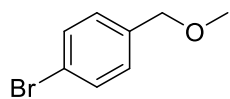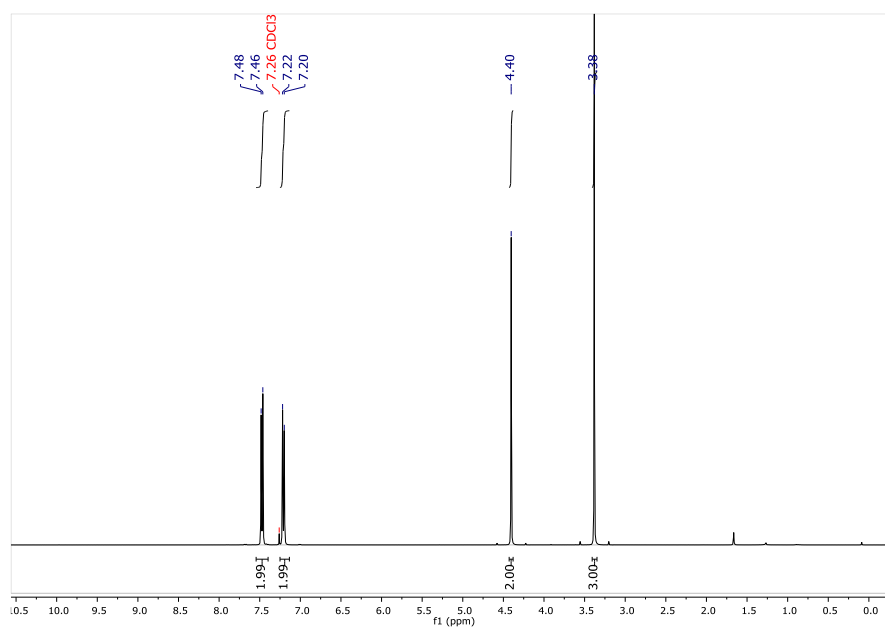

Figure S34 –  $^1\text{H}$ -NMR of **5e**

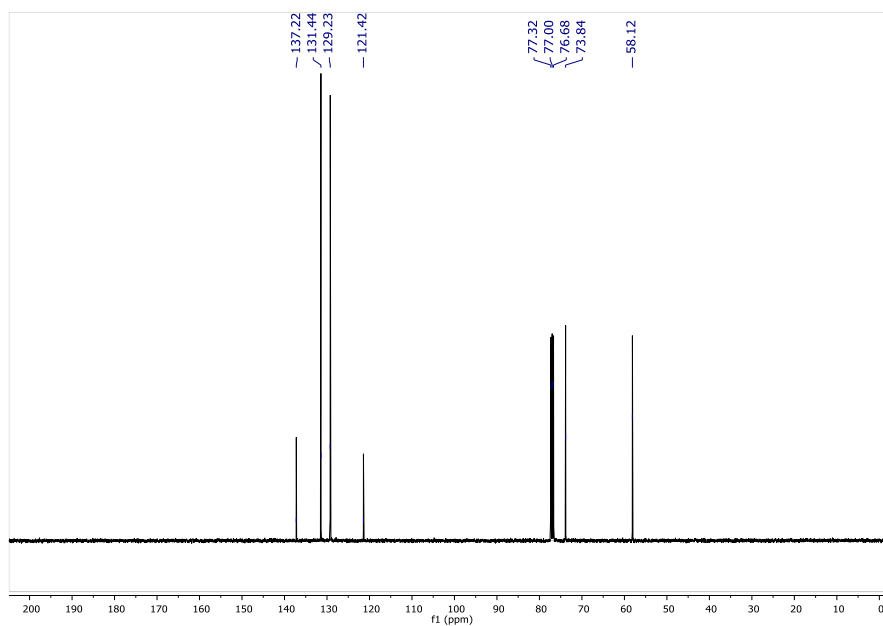

Figure S35 –  $^{13}\text{C}\{^1\text{H}\}$ -NMR of **5e**

**1,3-dihydroisobenzofuran **5f****

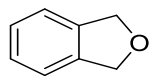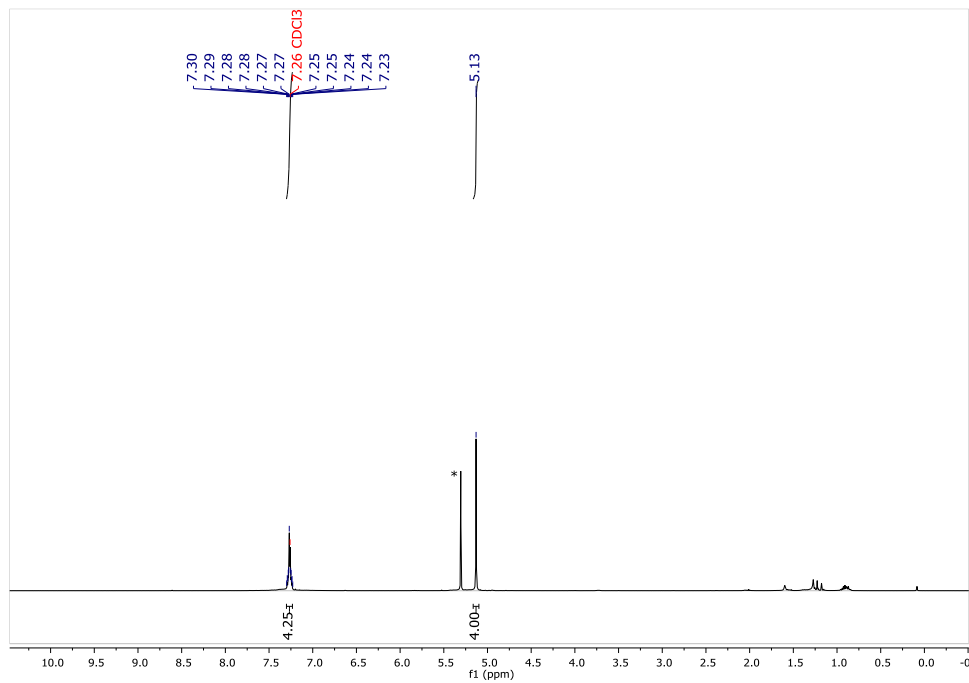

Figure S36 –  $^1\text{H}$ -NMR of **5f**. \* Peak corresponding to  $\text{CH}_2\text{Cl}_2$ .

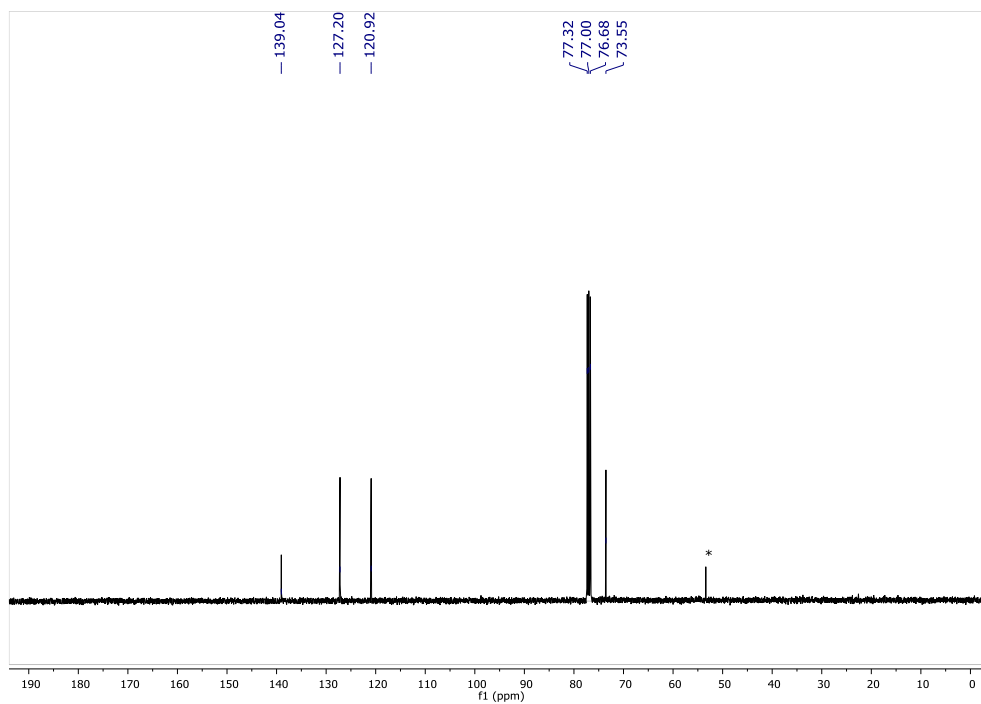

Figure S37 –  $^{13}\text{C}\{^1\text{H}\}$ -NMR of **5f**. \* Peak corresponding to  $\text{CH}_2\text{Cl}_2$ .

**(Ethoxymethyl)benzene 5g**

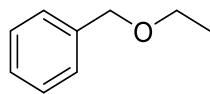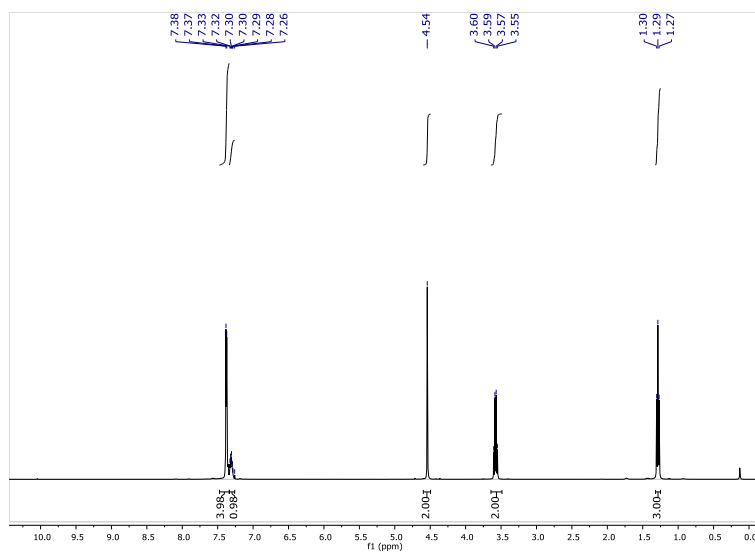

Figure S38 –  $^1\text{H}$ -NMR of **5g**

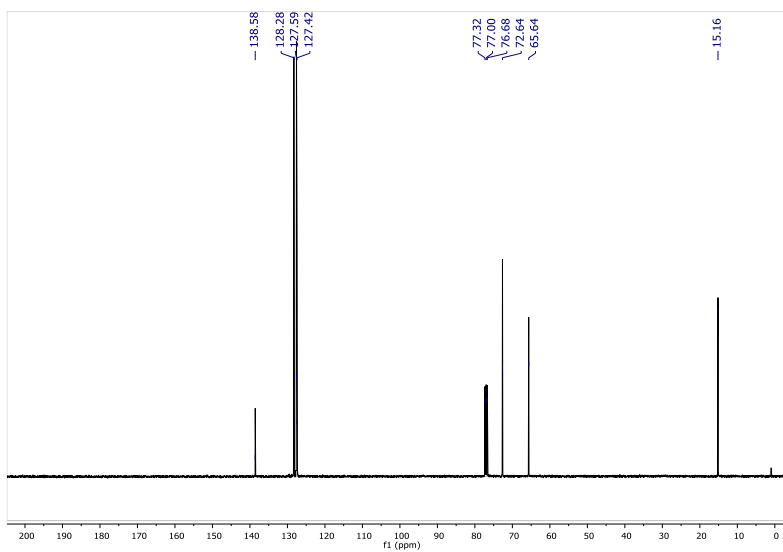

Figure S39 –  $^{13}\text{C}\{^1\text{H}\}$ -NMR of **5g**

(Benzyloxy)benzene **5h**

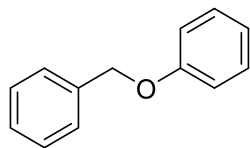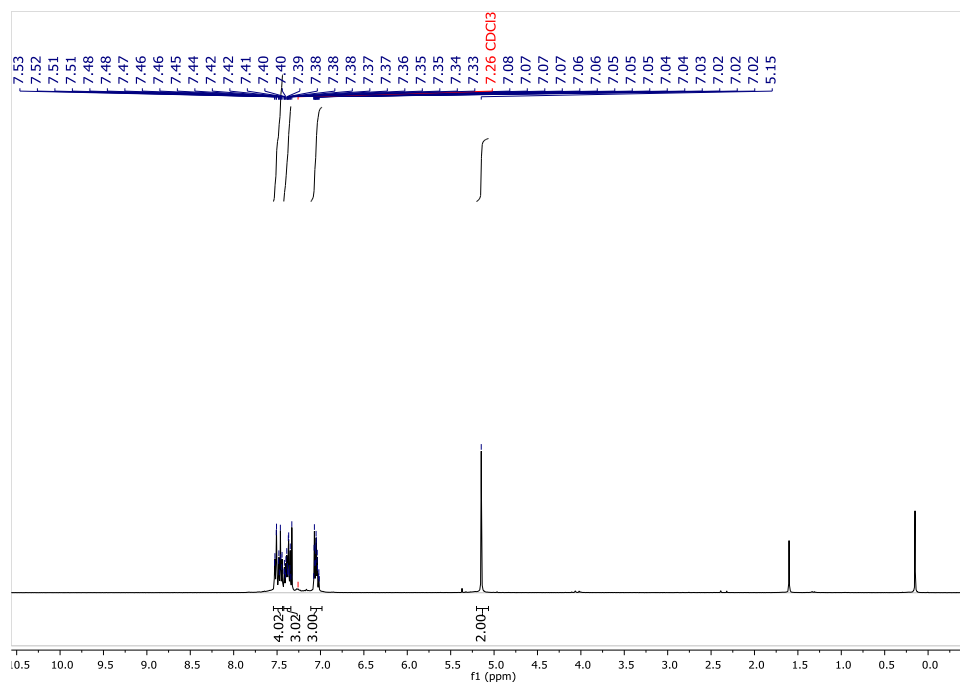

Figure S40 –  $^1\text{H}$ -NMR of **7e**

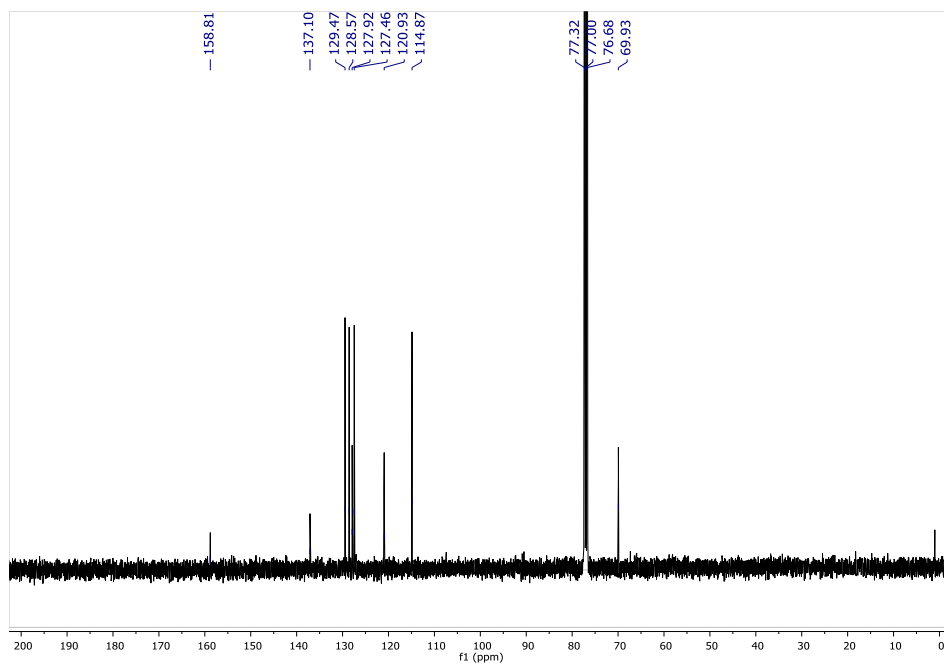

Figure S41 –  $^{13}\text{C}\{^1\text{H}\}$ -NMR of **7e**

**S-(4-Methylbenzyl) benzothioate 1a**

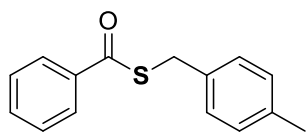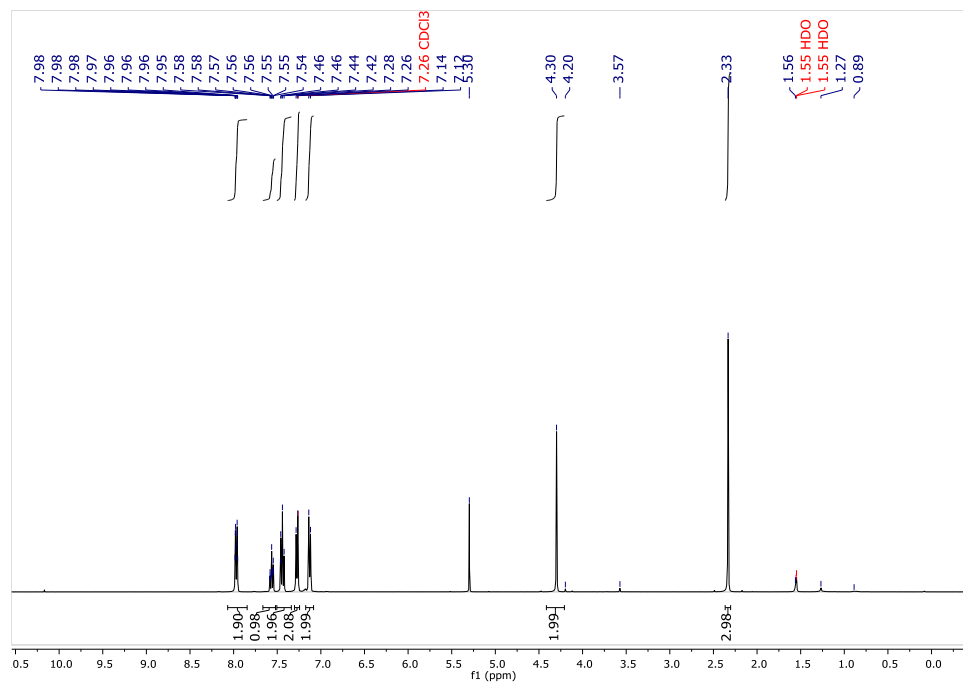

Figure S42 – <sup>1</sup>H-NMR of **1a**

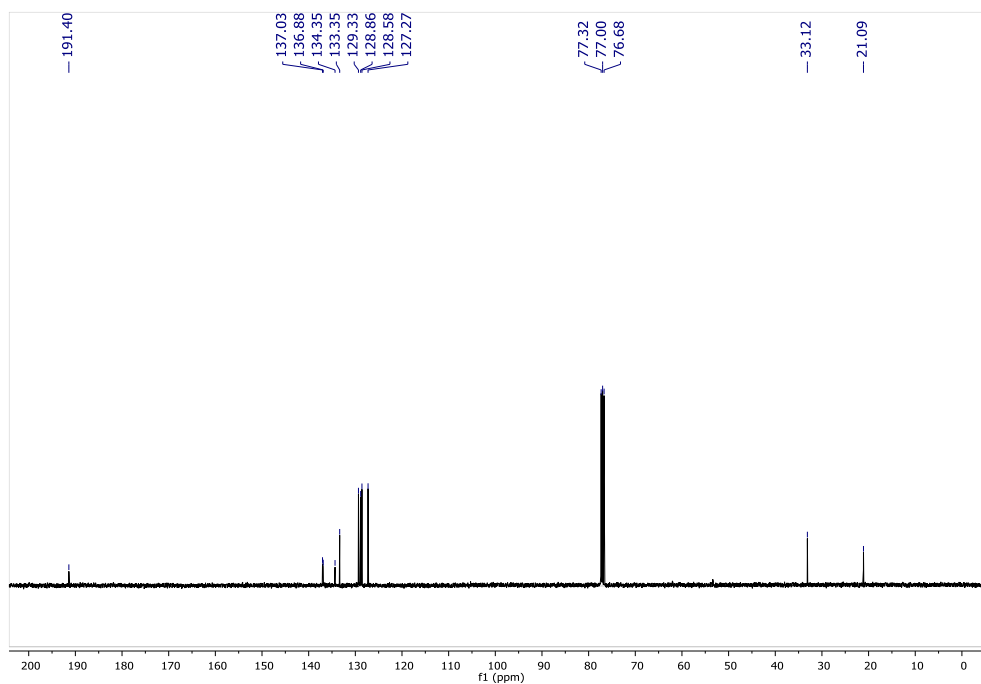

Figure S43 – <sup>13</sup>C{<sup>1</sup>H}-NMR of **1a**

**S-Benzyl benzothioate 1b**

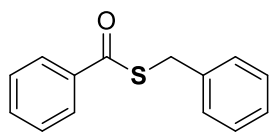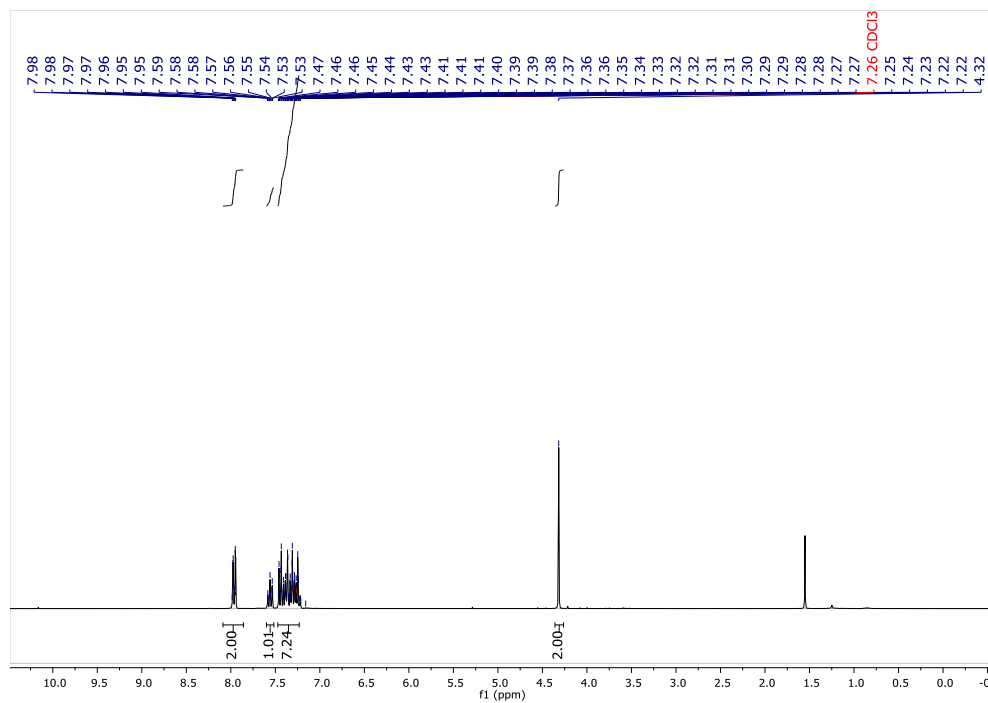

Figure S44 – <sup>1</sup>H-NMR of **1b**

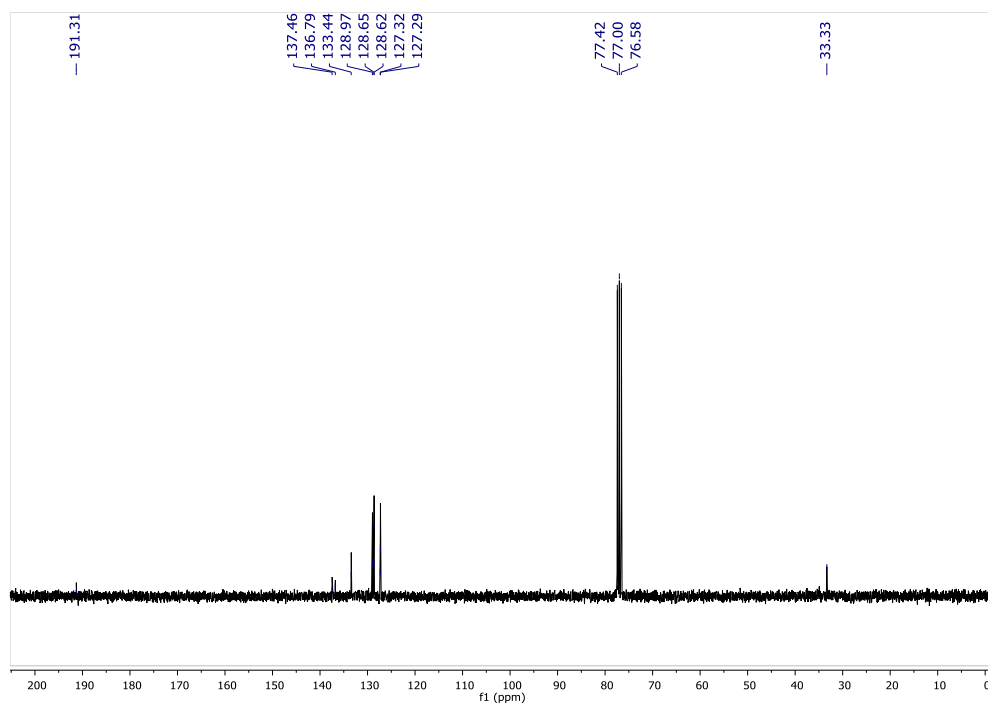

Figure S45 – <sup>13</sup>C{<sup>1</sup>H}-NMR of **1b**

**S-(4-Methylbenzyl) 4-methoxybenzothioate 1c**

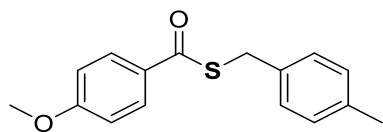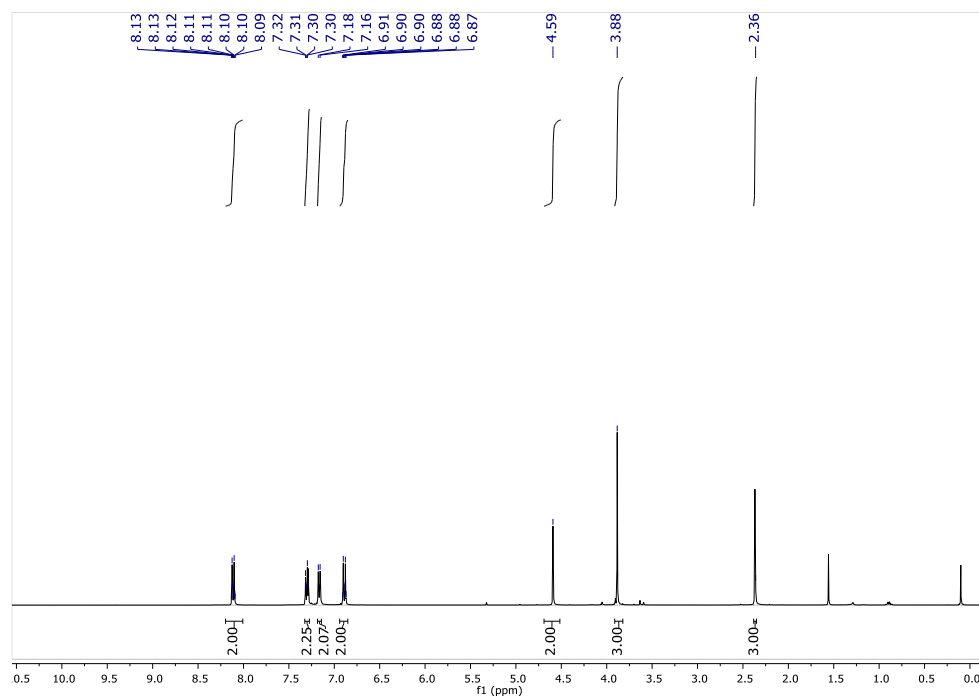

Figure S46 – <sup>1</sup>H-NMR of **1c**

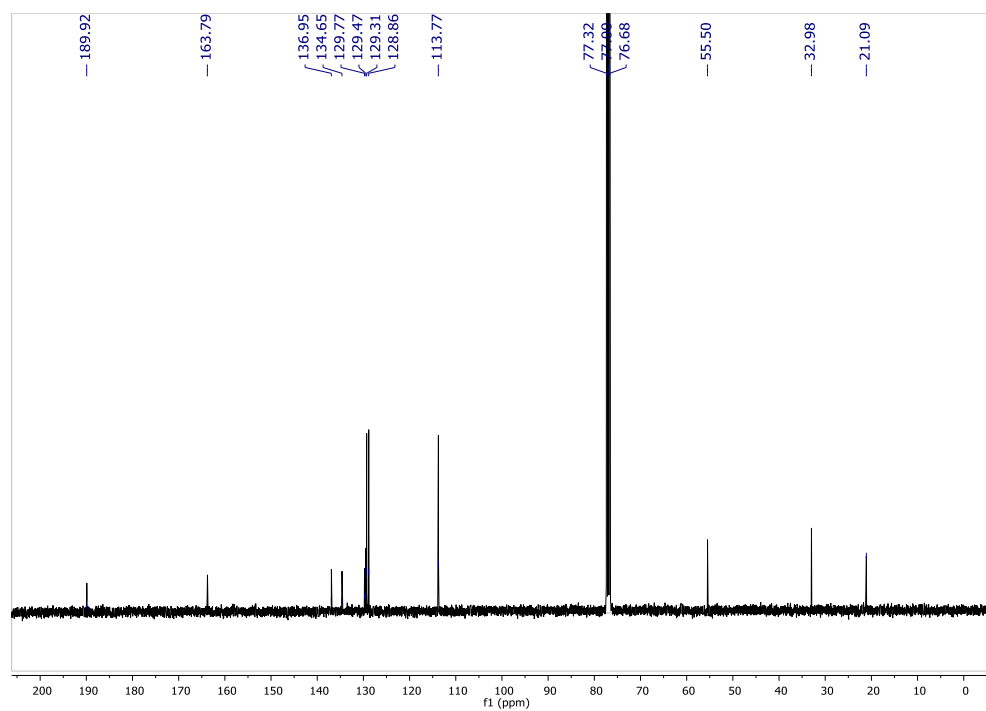

Figure S47 – <sup>13</sup>C{<sup>1</sup>H}-NMR of **1c**

**S-(4-Methylbenzyl) 2,4,6-trimethylbenzothioate 1d**

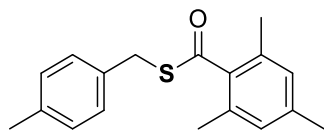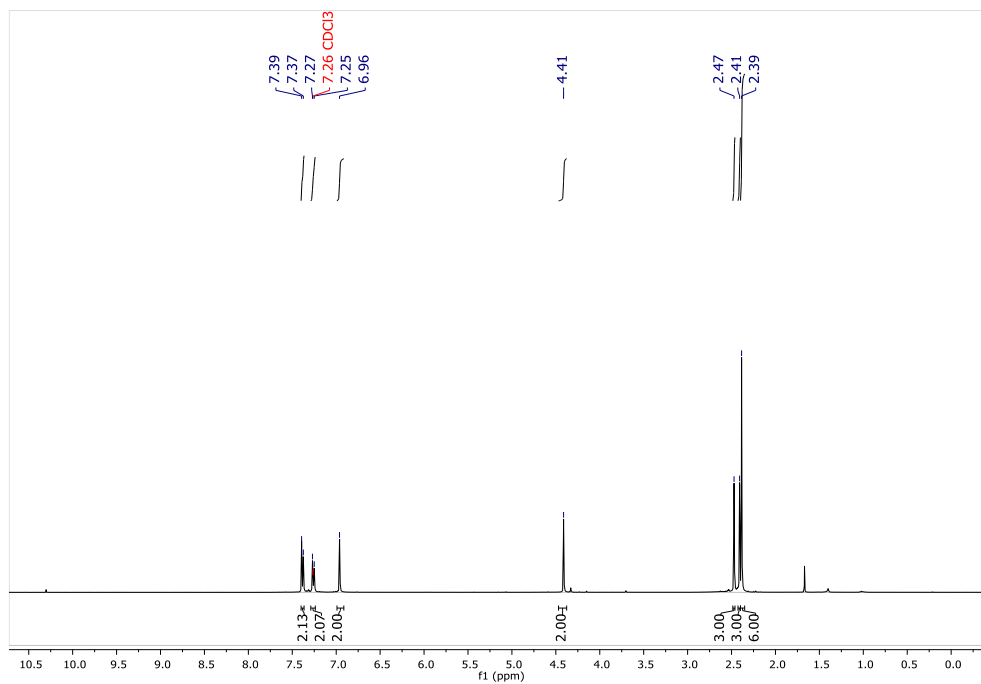

Figure S48 –  $^1\text{H}$ -NMR of **1d**

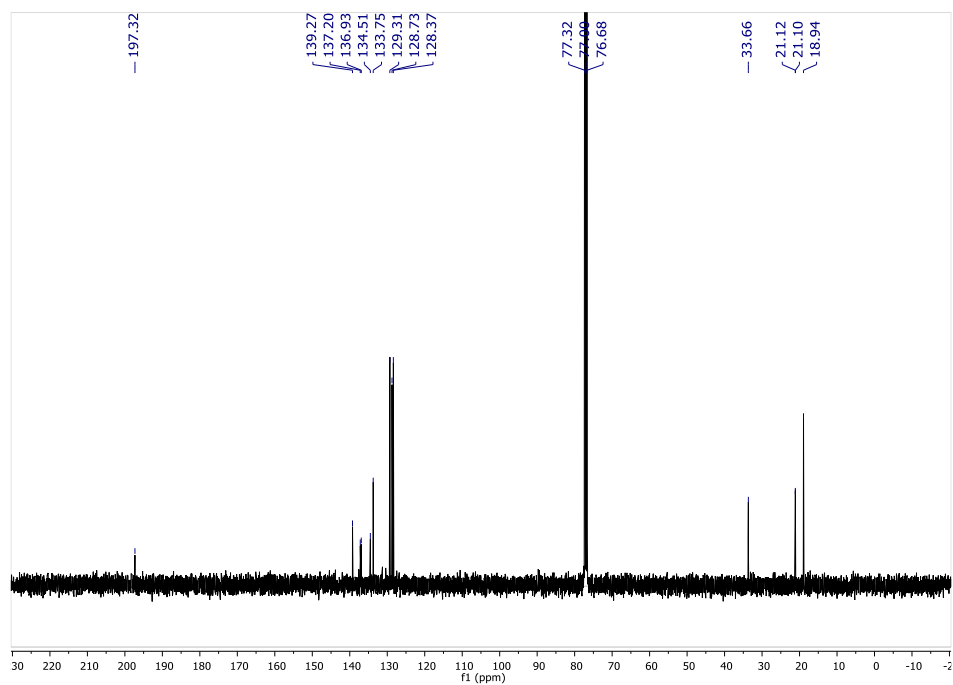

Figure S49 –  $^{13}\text{C}\{^1\text{H}\}$ -NMR of **1d**

**S-(4-Methylbenzyl) 4-chlorobenzothioate **1e****

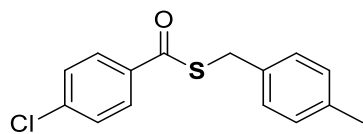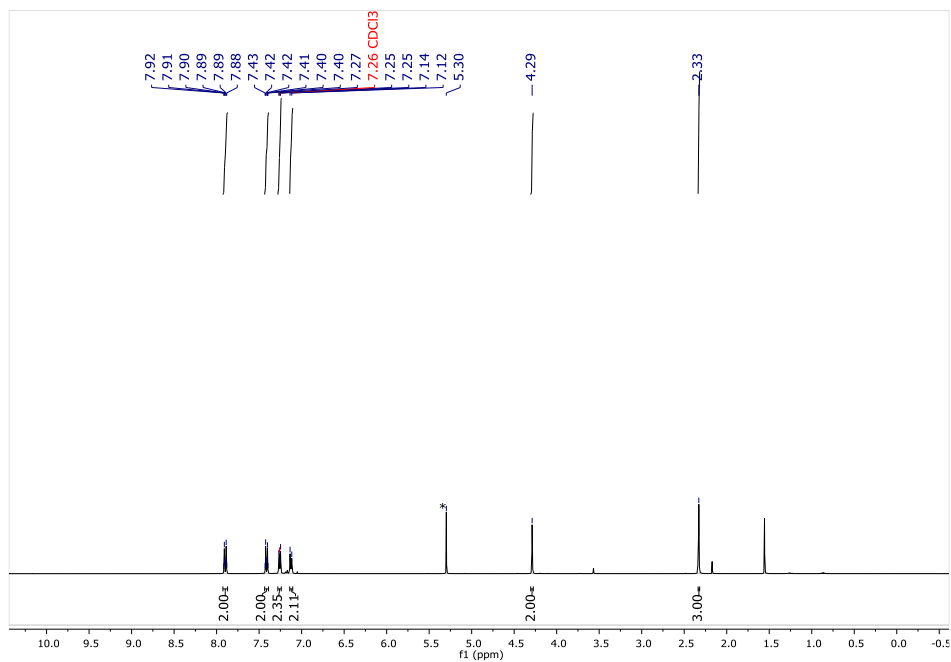

Figure S50 – <sup>1</sup>H-NMR of **1e**. \* Trace of CH<sub>2</sub>Cl<sub>2</sub>.

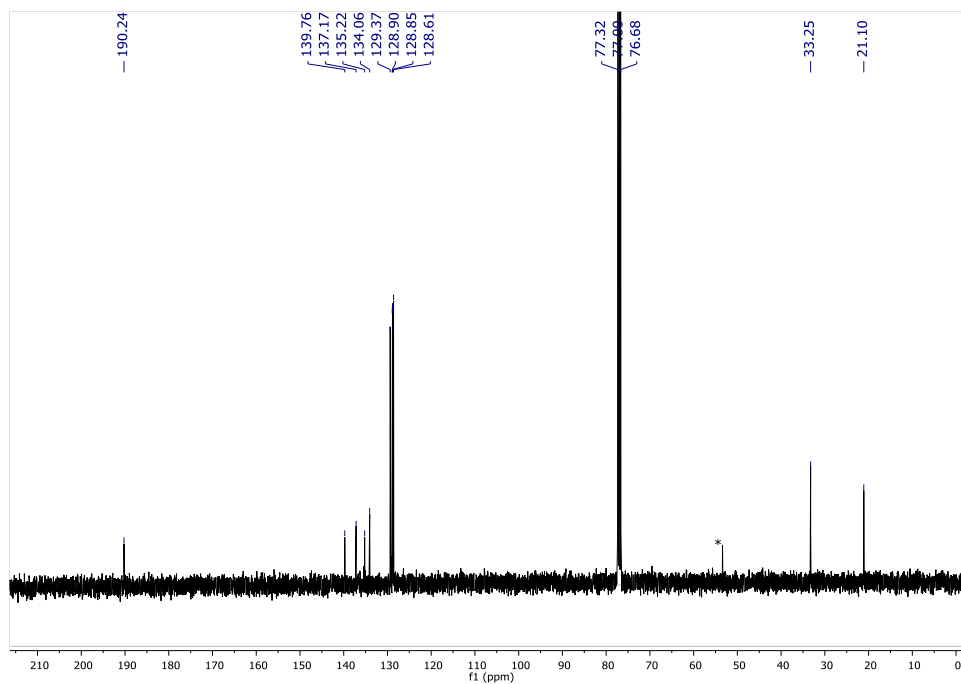

Figure S51 – <sup>13</sup>C{<sup>1</sup>H}-NMR of **1e**. \* Trace of CH<sub>2</sub>Cl<sub>2</sub>.

**S-(2-Bromobenzyl) benzothioate **1f****

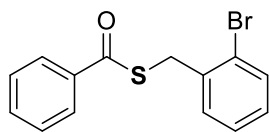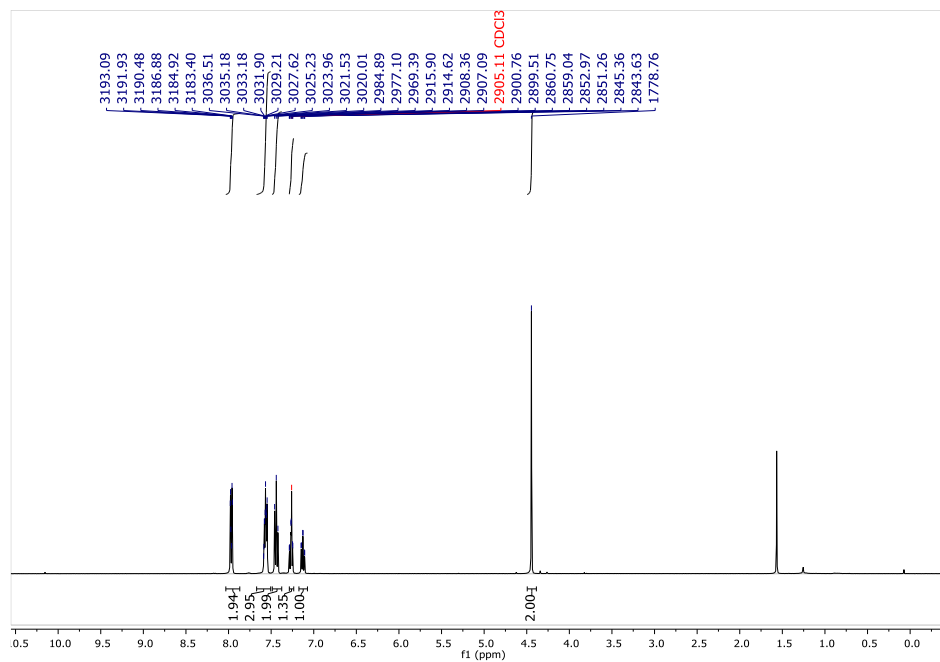

Figure S52 – <sup>1</sup>H-NMR of **1f**

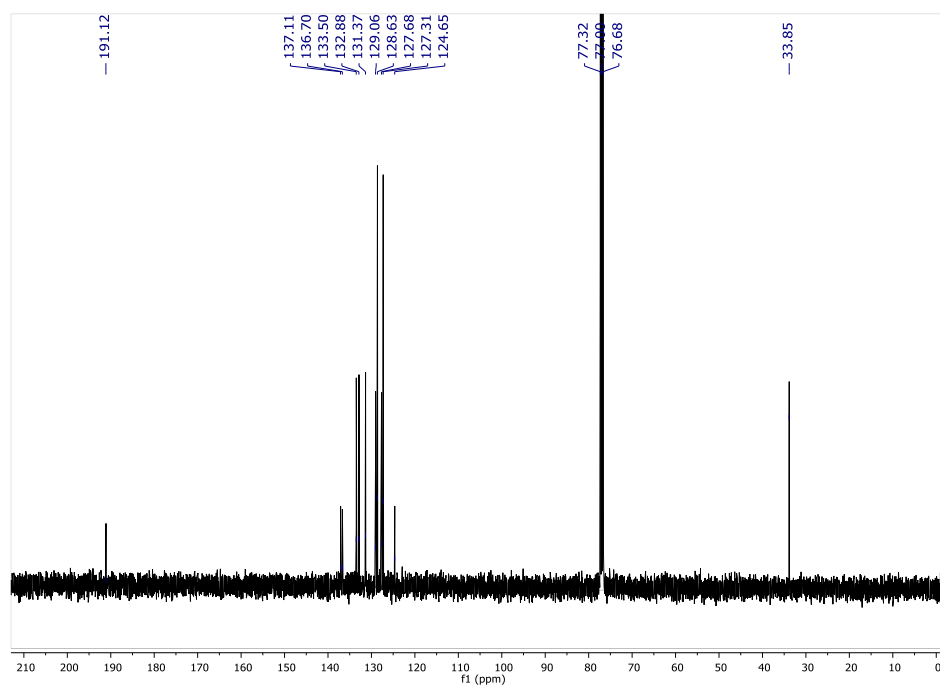

Figure S53 – <sup>13</sup>C{<sup>1</sup>H}-NMR of **1f**

**S-(4-Methylbenzyl) 4-(trifluoromethyl)benzothioate **1g****

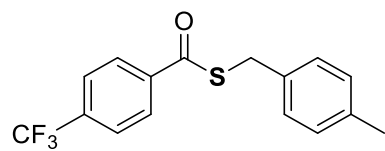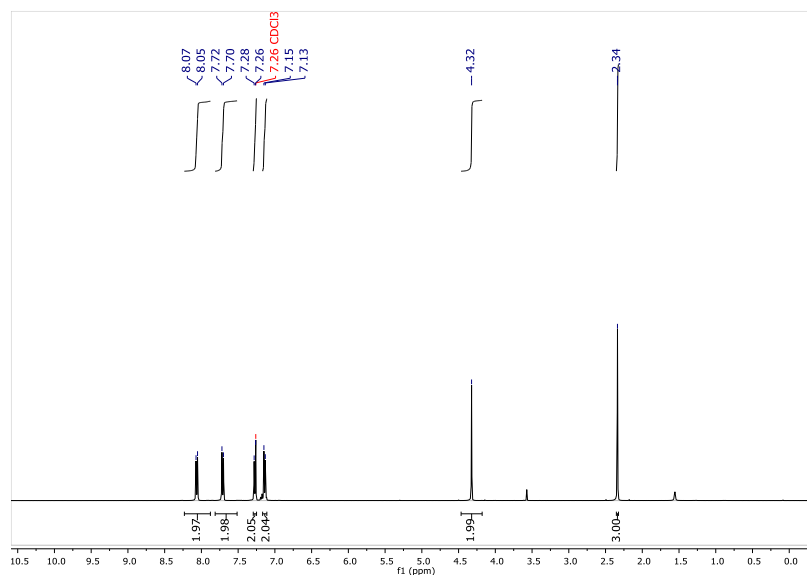

Figure S54 – <sup>1</sup>H-NMR of **1g**

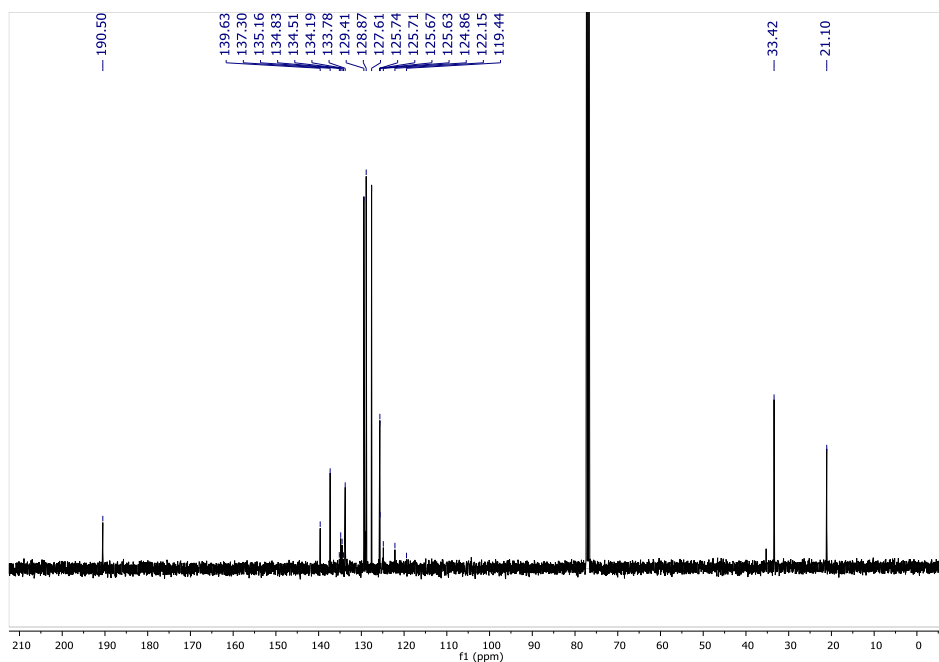

Figure S55 – <sup>13</sup>C{<sup>1</sup>H}-NMR of **1g**

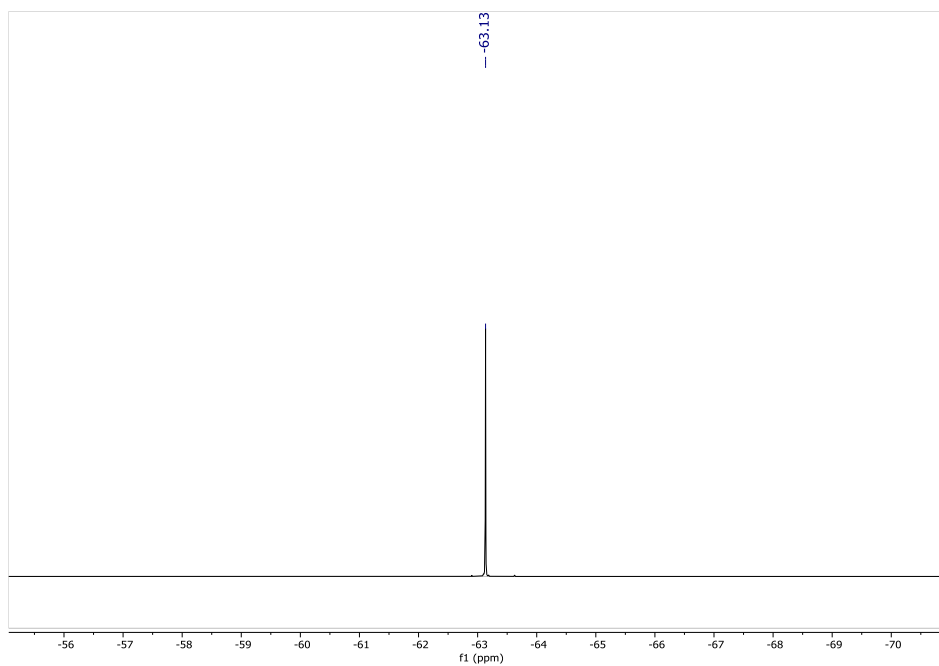

Figure S56 –  $^{19}\text{F}$ -NMR of **1g**

**S-(1-Phenylethyl) benzothioate 1h**

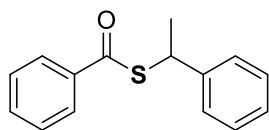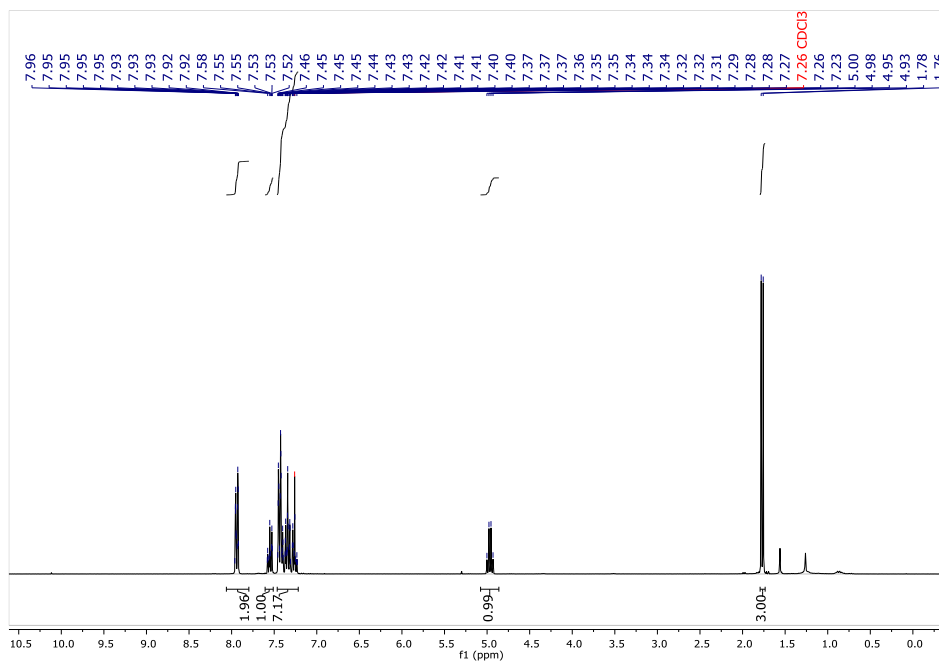

Figure S57 –  $^1\text{H}$ -NMR of **1h**

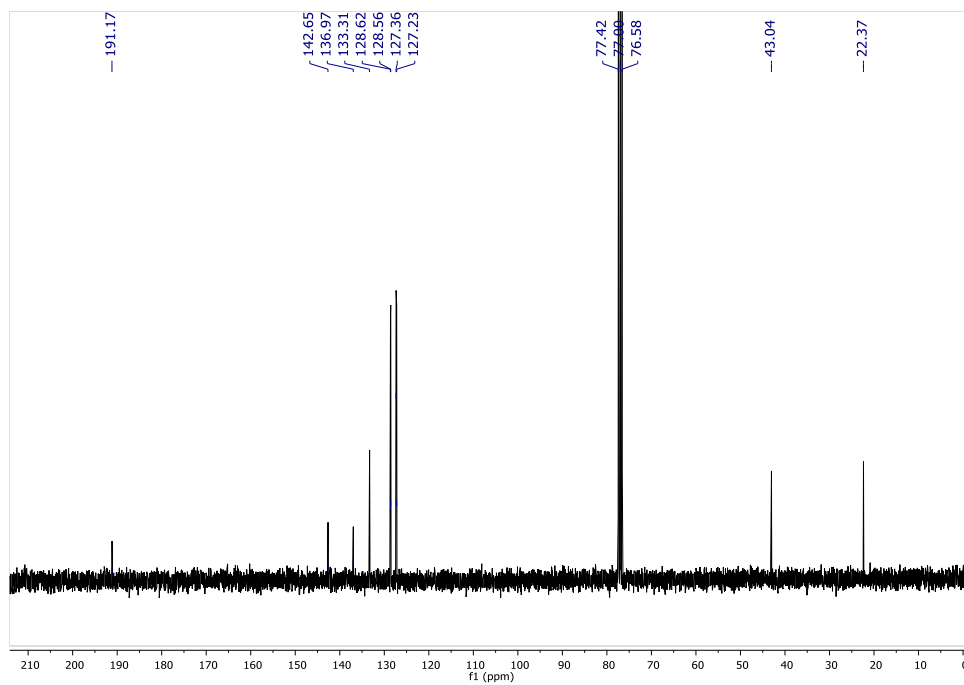

Figure S58 –  $^{13}\text{C}\{^1\text{H}\}$ -NMR of **1h**

**S-Phenethyl benzothioate **1i****

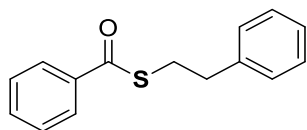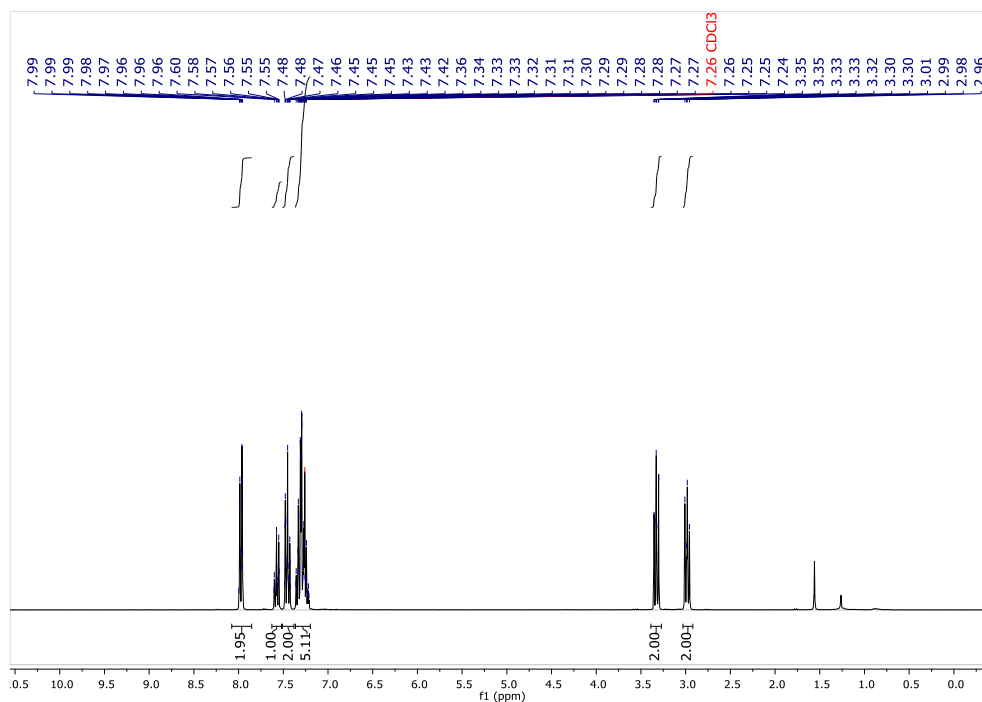

Figure S59 –  $^1\text{H}$ -NMR of **1i**

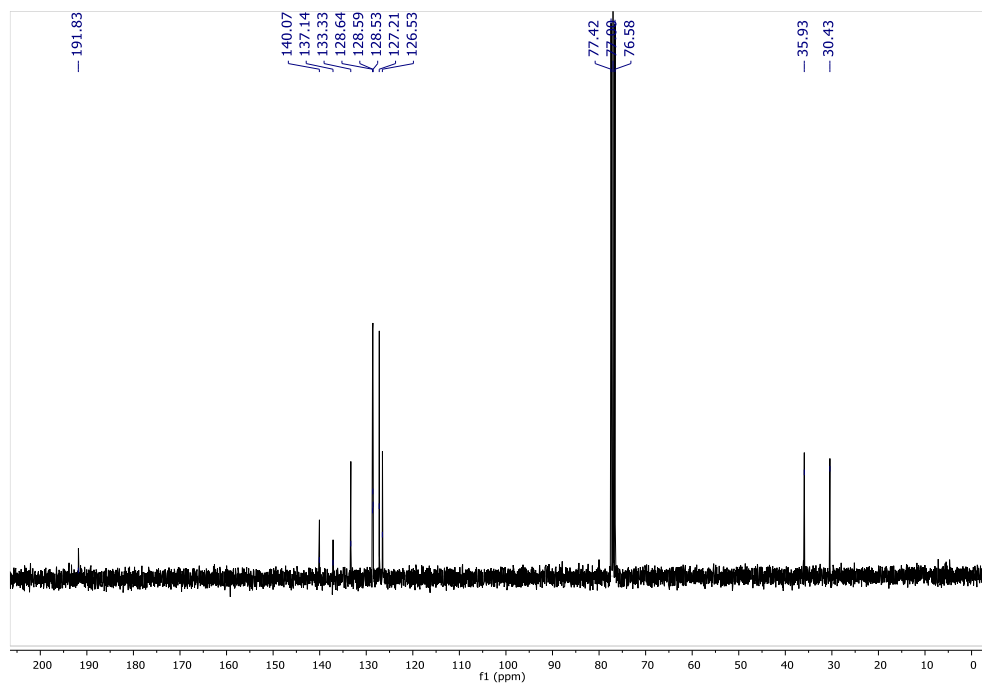

Figure S60 –  $^{13}\text{C}\{^1\text{H}\}$ -NMR of **1i**

**S-Octyl benzothioate **1j****

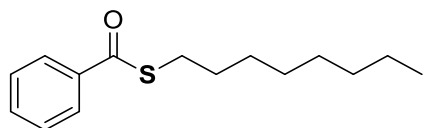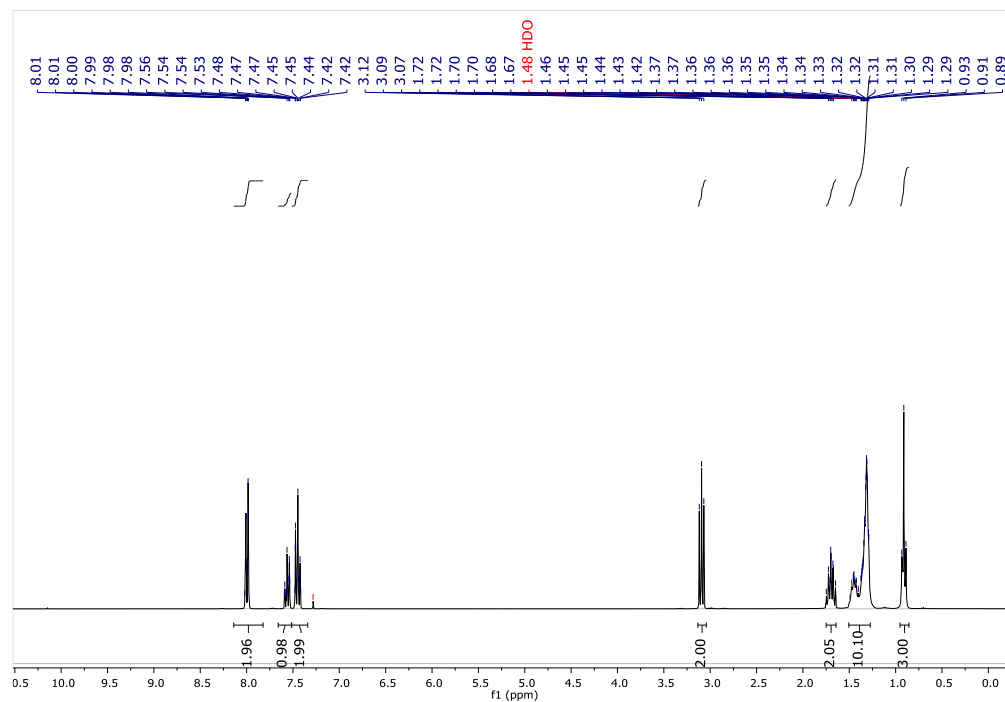

Figure S61 –  $^1\text{H}$ -NMR of **1j**

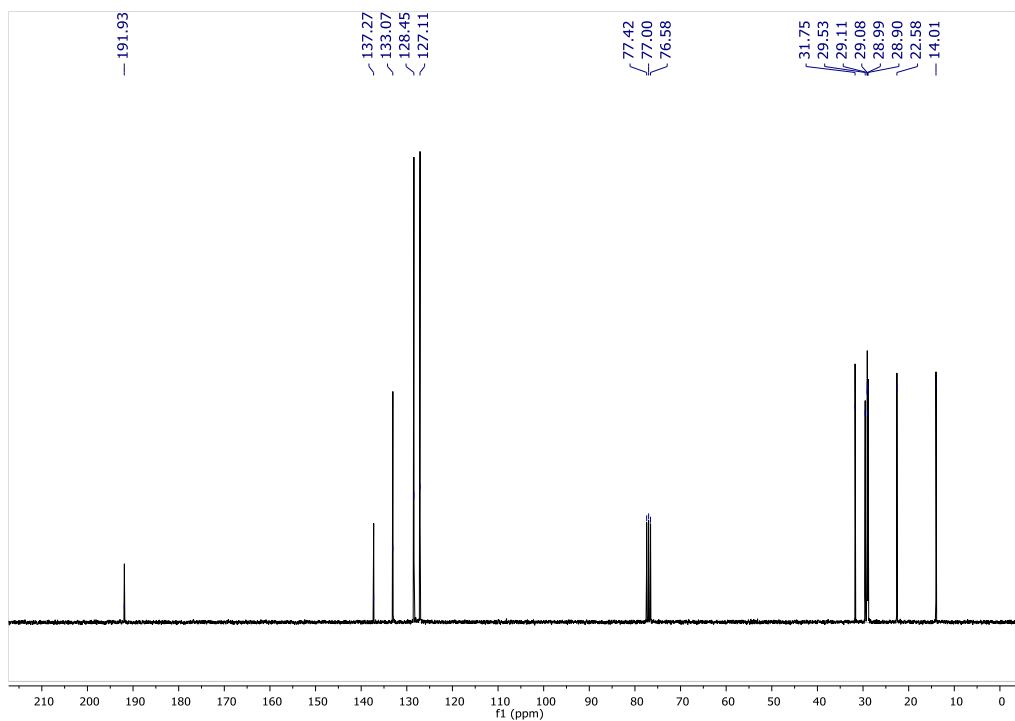

Figure S62 –  $^{13}\text{C}\{^1\text{H}\}$ -NMR of **1j**

**S-Isopropyl benzothioate 1k**

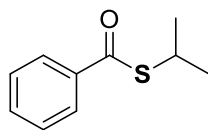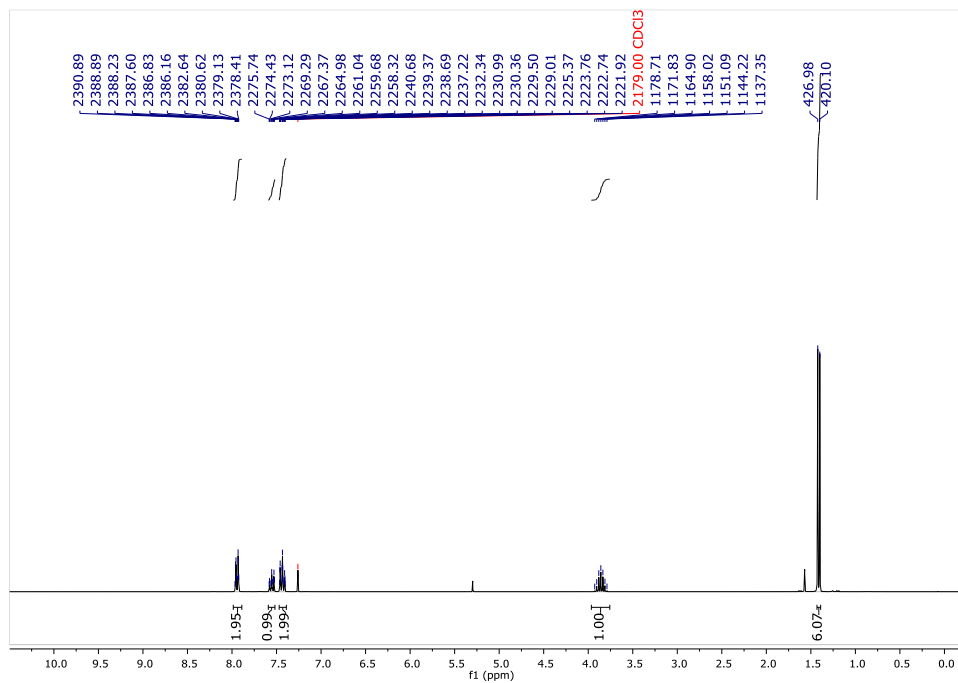

Figure S63 –  $^1\text{H}$ -NMR of **1k**

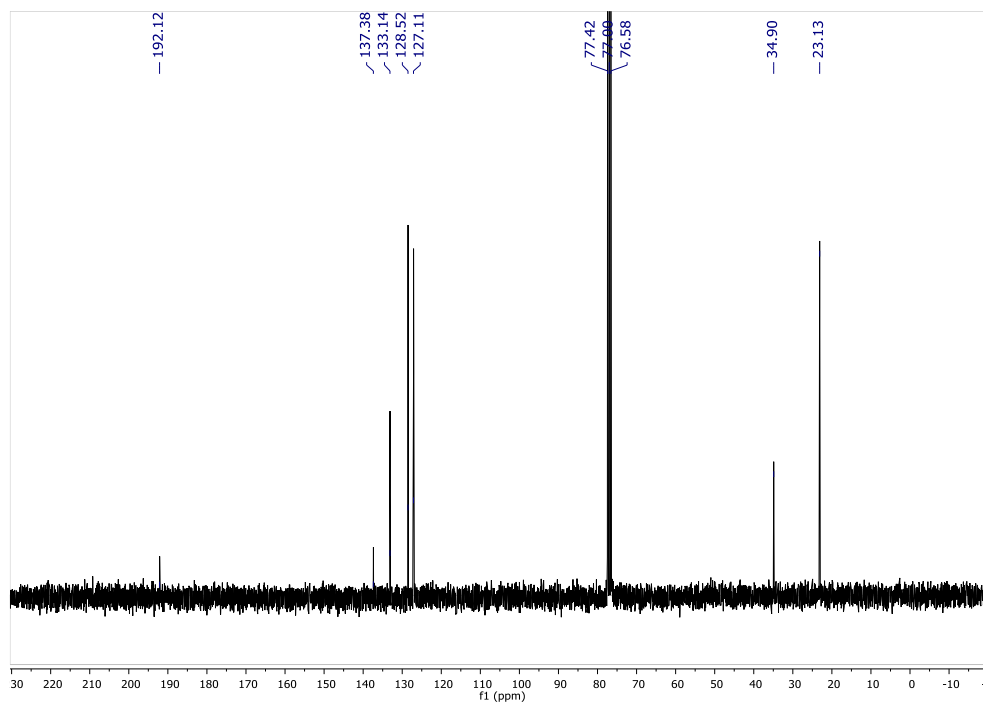

Figure S64 –  $^{13}\text{C}\{^1\text{H}\}$ -NMR of **1k**

### S-Phenyl ethanethioate **1l**

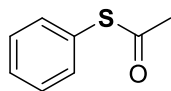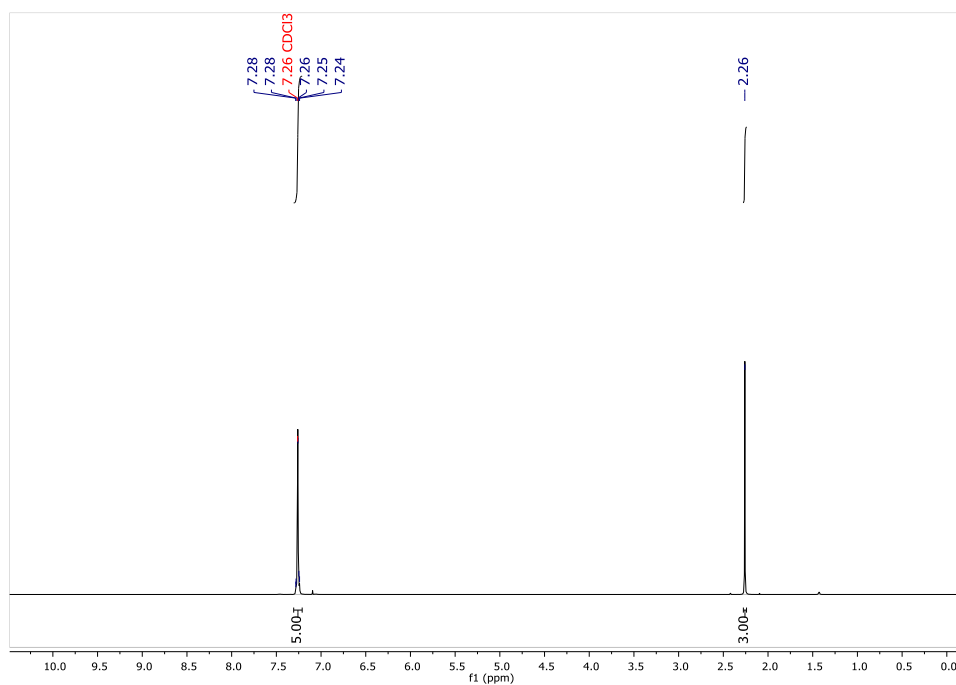

Figure S65 –  $^1\text{H}$ -NMR of **11**

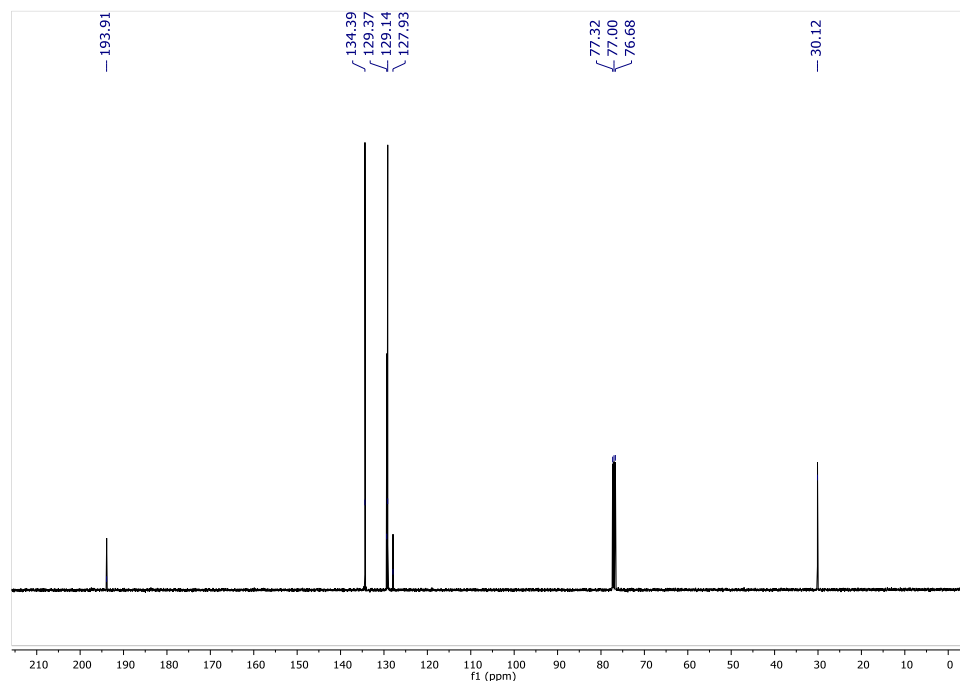

Figure S66 –  $^{13}\text{C}\{^1\text{H}\}$ -NMR of **11**

## 6. Experimental data for mechanism discussion

### 6.1. Radical scavenger action

Since iron is easily capable of single electron transfer (SET) reactions under blue light irradiation, the hydrosilylation reactions were conducted using radical-trapping agents such as TEMPO ((2,2,6,6-tetramethylpiperidin-1-yl)oxyl), diphenylethene or Galvinoxyl. Under the optimized conditions, the hydrosilylation reaction was not inhibited, which excluded any radical process (Scheme S1).

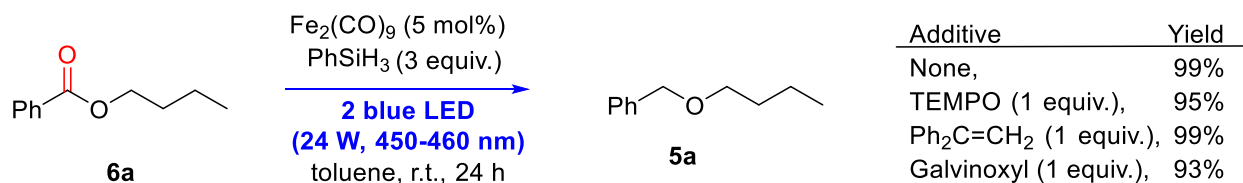

**Scheme S2.** Influence of radical scavengers on the deoxygenation

## 6.2 Stoichiometric experiments

### 6.2.1.- Stoichiometric reaction between $\text{Fe}_2(\text{CO})_9$ and phenylsilane

Stoichiometric reaction between  $\text{Fe}_2(\text{CO})_9$  and  $\text{PhSiH}_3$  in deuterated toluene ( $\text{C}_7\text{D}_8$ ) were performed at room temperature under blue light irradiation in order to detect the formation of Fe-H species. In Figure S67, in a classical glassware NMR tube. In Figure S68, in quartz NMR tube.

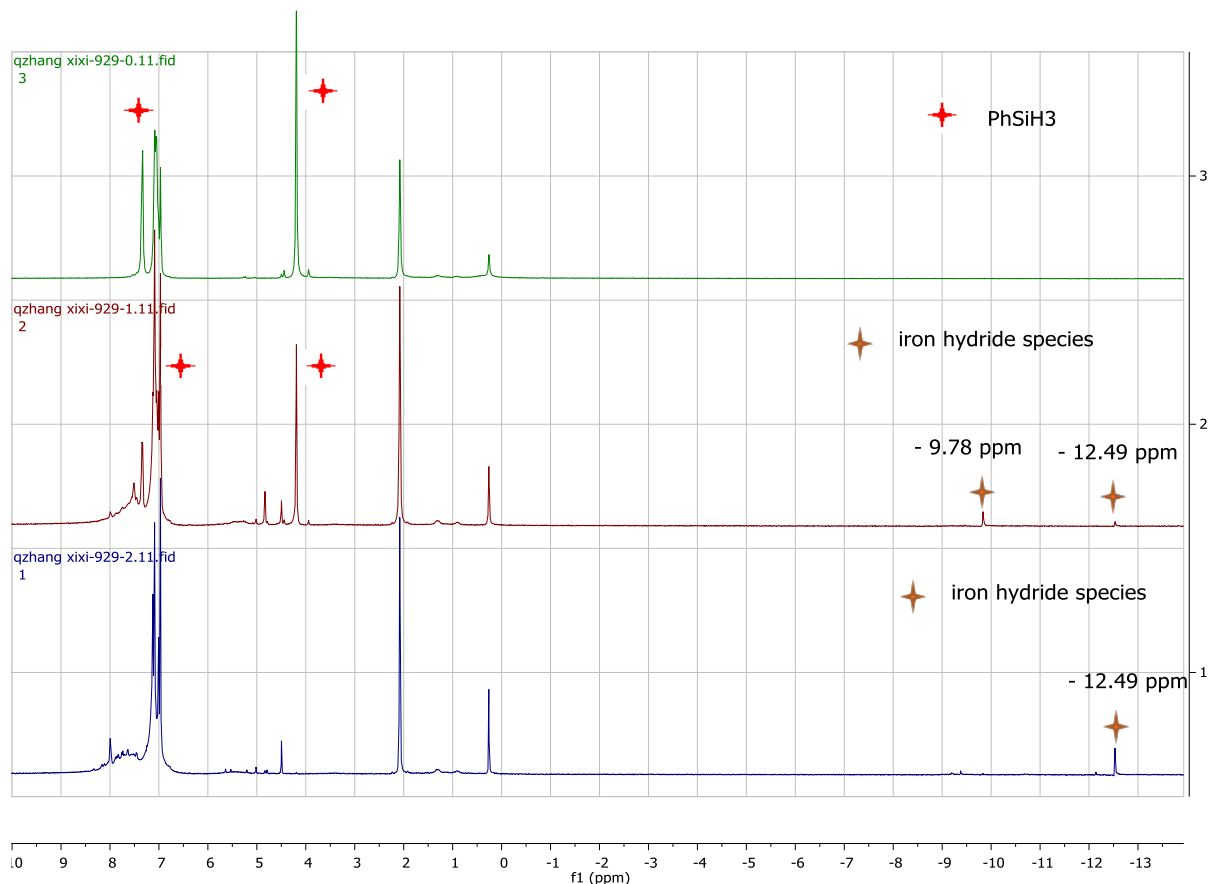

**Figure 67.** In a classical NMR tube, under argon atmosphere, 22.0 mg (0.03 mmol, 1 equiv.) of  $\text{Fe}_2(\text{CO})_9$  and 13 mg (0.06 mmol, 2 equiv.) of  $\text{PhSiH}_3$  were dissolved in 0.5 mL of deuterated toluene ( $\text{C}_7\text{D}_8$ ). The mixture was then irradiated for 6 h under blue light ( $2 \times 24$  W, 450-460 nm), ( $^1\text{H}$  NMR spectrum in Brown) and then 18 additional hours ( $^1\text{H}$  NMR spectrum in blue). For reference in green,  $^1\text{H}$  NMR spectrum of phenylsilane.

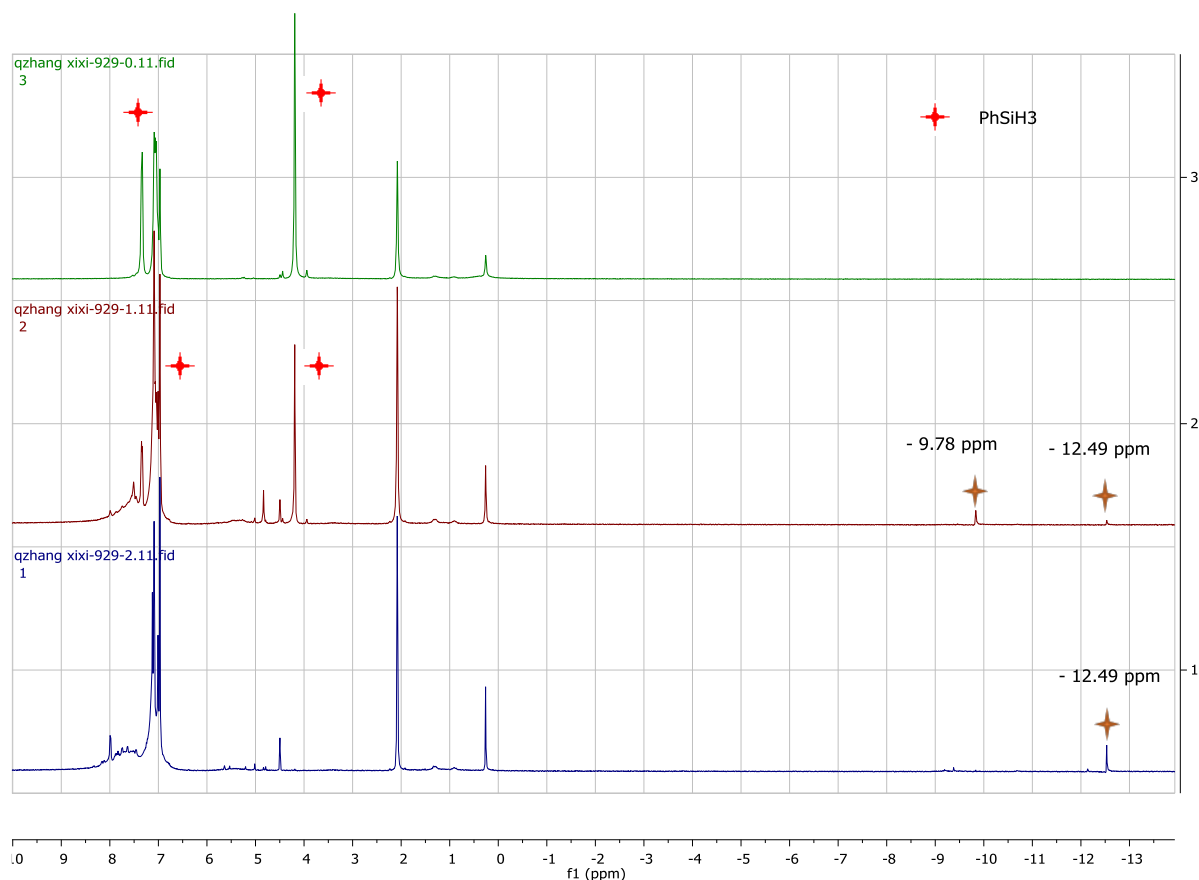

**Figure S68.** In a quartz tube, under argon atmosphere, 22.0 mg (0.03 mmol, 1 equiv.) of  $\text{Fe}_2(\text{CO})_9$  and 13 mg (0.06 mmol, 2 equiv.  $\text{PhSiH}_3$ ) were dissolved in 0.5 mL of deuterated toluene ( $\text{C}_7\text{D}_8$ ). The mixture was then irradiated for 6 h under blue light ( $2 \times 24$  W, 450-460 nm) ( $^1\text{H}$  NMR spectrum in Brown), and then 18 additional hours ( $^1\text{H}$  NMR spectrum in blue). For reference in green,  $^1\text{H}$  NMR spectrum of phenylsilane.

### 6.2.2. Stoichiometric reaction between the in-situ generated species from $\text{Fe}_2(\text{CO})_9$ and phenylsilane with thioester 1g

1- In a Young tube, under argon atmosphere, 11.0 mg (0.03 mmol, 1 equiv.) of  $\text{Fe}_2(\text{CO})_9$  and 6.5 mg (0.06 mmol, 2 equiv.  $\text{PhSiH}_3$ ) were dissolved in 0.5 mL of deuterated toluene ( $\text{C}_7\text{D}_8$ ). Figure S69 showed the  $^1\text{H}$ -NMR of the mixture before light activation.

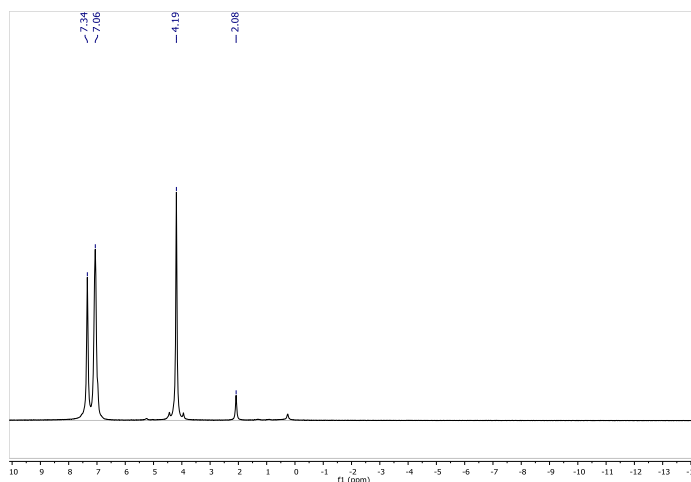

**Figure S69** -  $^1\text{H}$ -NMR of the mixture  $\text{Fe}_2(\text{CO})_9 + \text{PhSiH}_3$  before light activation.

2. The resulting mixture was then irradiated for 12 h under blue light ( $2 \times 24$  W, 450-460 nm), and 9.3 mg (0.03 mmol, 1 equiv.) of S-(4-methylbenzyl) 4-(trifluoromethyl)benzothioate **1g** was added to the reaction mixture. The reaction was kept in dark for 16 h.

The  $^1\text{H}$  (Figure S70) and  $^{19}\text{F}$ -NMR (Figure S71) spectra showed that (i) iron hydride species were formed (signals at -9.62 and -12.51 ppm) and that (ii) the starting thioester **1g** was not consumed.

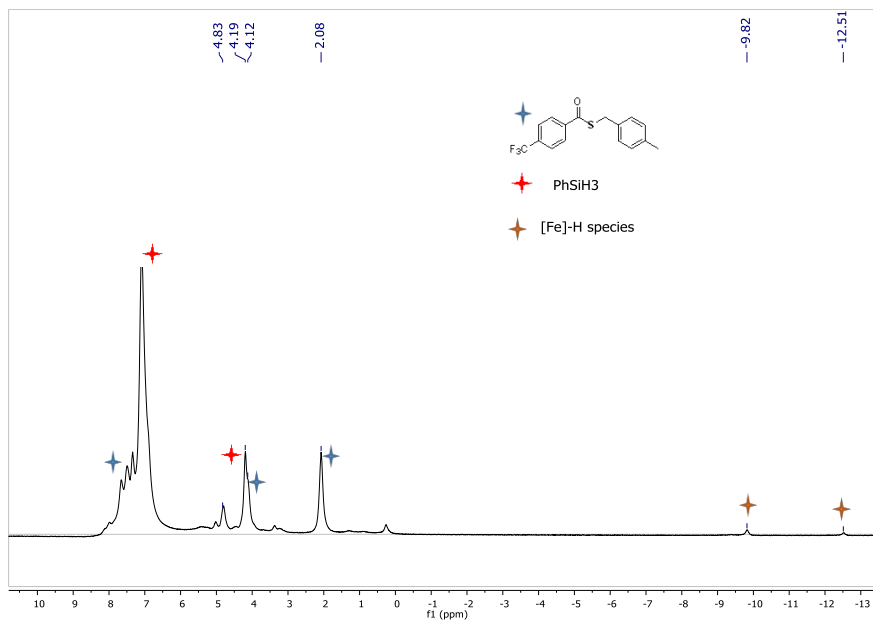

**Figure S70** -  $^1\text{H}$ -NMR of the mixture  $\text{Fe}_2(\text{CO})_9 + \text{PhSiH}_3$  irradiated by blue light for 12 h to which thioester **1g** was added, and kept without irradiation for 16 h.

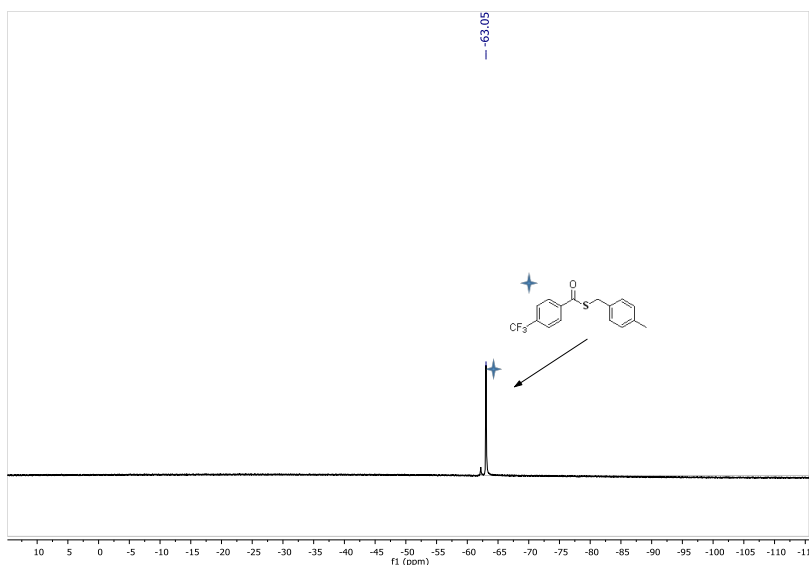

**Figure S71** -  $^{19}\text{F}$ -NMR of the mixture  $\text{Fe}_2(\text{CO})_9 + \text{PhSiH}_3$  irradiated by blue light for 12 h to which thioester **1g** was added, and kept without irradiation for 16 h.

3. Then, the reaction mixture was irradiated under blue light ( $2 \times 24$  W, 450-460 nm) for 6 h. The  $^1\text{H}$  and  $^{19}\text{F}$ -NMR spectra showed that (i) an iron hydride species was formed (signal at -12.51 ppm) and that (ii) the starting thioamide **1g** was fully consumed and the thioester **2g** was formed. (Figures S72 and S73) Noticeably, an unidentified by-product was also produced (Signals at 2.11 or 2.13 ppm).

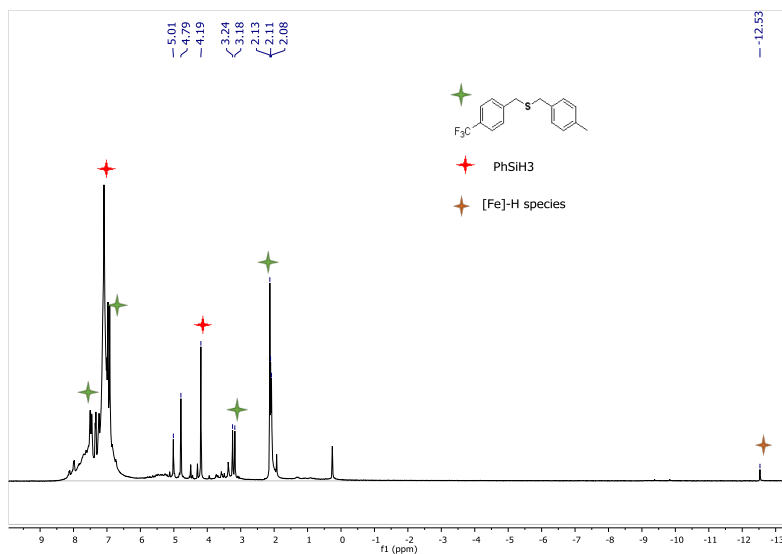

**Figure S72** -  $^1\text{H}$ -NMR of the mixture  $\text{Fe}_2(\text{CO})_9 + \text{PhSiH}_3$  irradiated by blue light for 12 h to which thioester **1g** was added, and the resulting mixture was irradiated by blue light for 6 h.

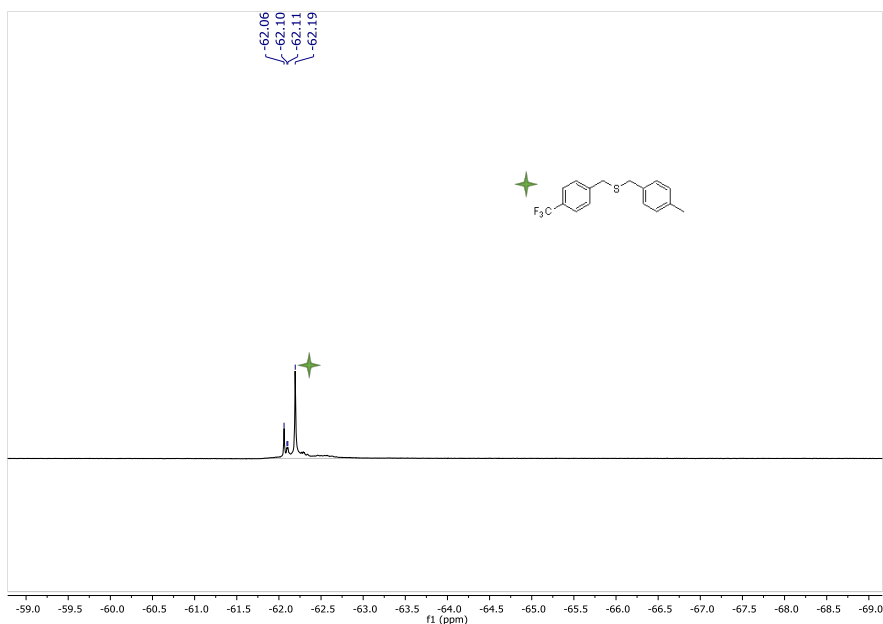

**Figure S73** –  $^{19}\text{F}$ -NMR of the of the mixture  $\text{Fe}_2(\text{CO})_9 + \text{PhSiH}_3$  irradiated by blue light for 12 h to which thioester **1g** was added, and the resulting mixture was irradiated by blue light for 6 h

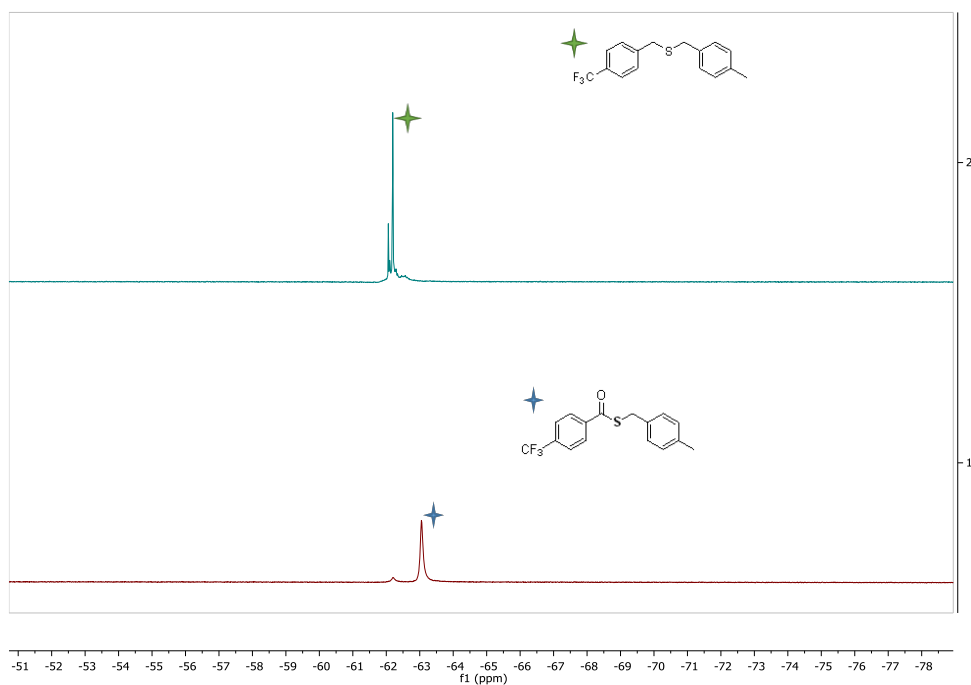

**Figure S74** –  $^{19}\text{F}$ -NMR of the of the mixture  $\text{Fe}_2(\text{CO})_9 + \text{PhSiH}_3$  irradiated by blue light for 12 h to which thioester **1g** was added, and the resulting mixture was irradiated by blue light for 6 h (Green spectrum). Brown spectrum, starting thioester **1g**, for reference.

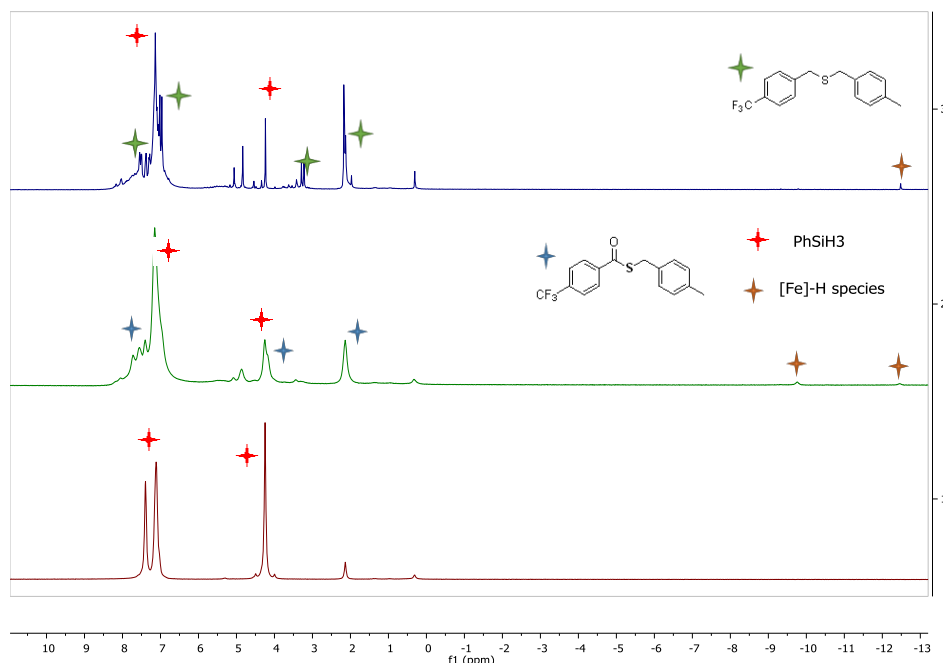

**Figure S75** – Stacked  $^1\text{H}$  NMR (figures S69, brown), S70 (green) and S72 (blue) for comparison.

### 6.2.3. Stoichiometric reaction between the in-situ generated Fe-H species from $\text{Fe}_2(\text{CO})_9$ and phenylsilane with thioester **1g**

To identify which iron hydride species ( $\delta = -12.5$  ppm or  $\delta = -9.8$  ppm) participated to the reduction of the thioester, an additional experiment was conducted. In a Young's tube under argon,  $\text{Fe}_2(\text{CO})_9$  (11.0 mg, 0.03 mmol, 1.0 equiv.) and  $\text{PhSiH}_3$  (6.5 mg, 0.06 mmol, 2.0 equiv.) were dissolved in 0.5 mL of  $\text{C}_7\text{D}_8$  and irradiated under blue light ( $2 \times 24$  W, 450–460 nm) for 24 h. After confirming that only the characteristic hydride resonance at  $-12.49$  ppm remained, S-(4-methylbenzyl)-4-(trifluoromethyl)phenylthioester (**1g**, 9.3 mg, 0.03 mmol, 1.0 equiv.) was added. The reaction mixture was subsequently irradiated for 6, 12, and 72 h.  $^{19}\text{F}$  NMR analysis showed no formation of thioether **2g**, thereby indicating that the hydride species corresponding to the signal at  $-9.78$  ppm should correspond to the active species responsible for thioester reduction. (Figure S76)

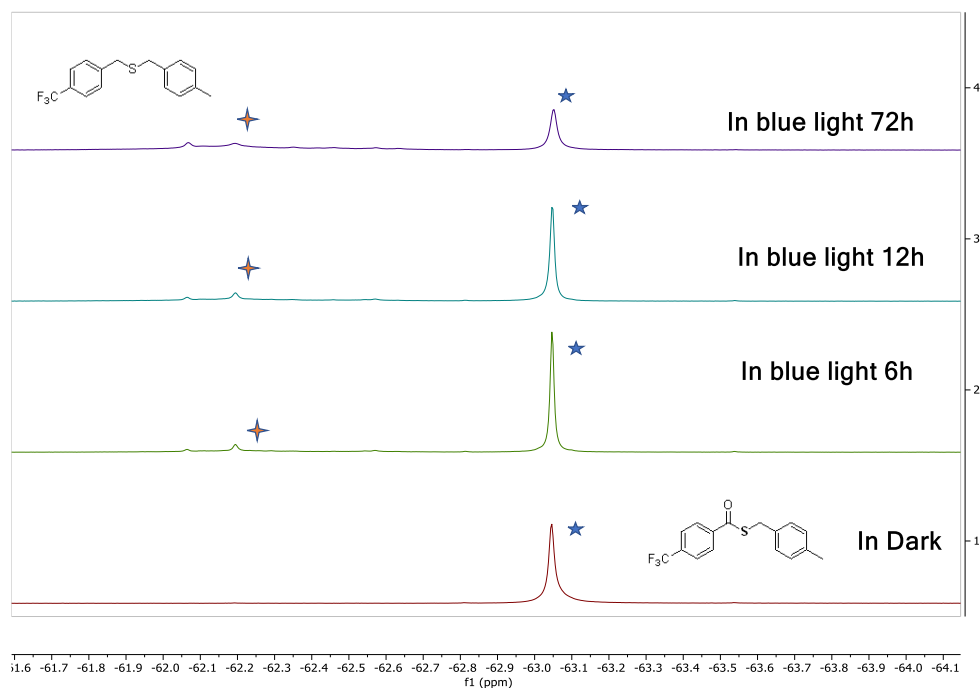

**Figure S76.**  $^{19}\text{F}$ -NMR spectra of the of the mixture after 6, 12, 72h under blue light irradiation.

## 7. References

- [1] S. Kotha, N. K. Gupta and S. Ansari, *RSC Adv.* 2022, **12**, 25154-25162.
- [2] T. Takido and K. Itabashi, *Synthesis* 1987, 817-819.
- [3] W.-Y. Zhou, M. Chen, P.-Z. Zhang, A.-Q. Jia and Q.-F. Zhang, *J. Chem. Cryst.* 2021, **51**, 301-310.
- [4] J. Ash, K. Curtis, S. Bhowmik, S. O. Odoh and J. Y. Kang, *J. Org. Chem.* 2025, **90**, 1167-1174.
- [5] J. Xu, Y. Chen, W. rao, F. Wang, S.-S. Shen, P. Song and S.-Y. Wang, *Org. Lett.* 2025, **27**, 4542-4546.
- [6] N. Sakai, T. Miyazaki, T. Sakamoto, T. Yatsuda, T. Moriya, R. Ikeda and T. Konakahara, *Org. Lett.* 2012, **14**, 4366-4369.
- [7] Y. Dong, P. Ji, Y. Zhang, C. Wang, X. Meng and W. Wang, *Org. Lett.* 2020, **22**, 9562-9567.

- [8] S. Anselmi, S. Liu, S.-K. Kim, S. M., Barry, T. S. Moody and D. Castagnolo, *Org. Biomol. Chem.* 2021, **19**, 156–161.
- [9] T. Connolly, Z. Wang, M. A. Walker, I. M. McDonald and K. M. Peese, *Org. Lett.* 2014, **16**, 4444–4447.
- [10] G. A. Molander and B. Canturk, *Org. Lett.* 2008, **10**, 2135–2138.
- [11] M. Bakos, Á. Gyömöre, A. Domján and T. Soós, *Angew. Chem. Int. Ed.* 2017, **56**, 5217–5221.
- [12] F. G. Delolo, J. Fessler, H. Neumann, K. Junge, E. N. dos Santos, E. V. Gusevskaya and M. Beller, *Chem. Eur. J.* 2022, **28**, e202103903.
- [13] V. Rysak, R. Dixit, X. Trivelli, N. Merle, F. Agbossou-Niedercorn, K. Vanka and C. Michon, *Catal. Sci. Technol.* 2020, **10**, 4586–4592.
- [14] B. Li, Y. Liu, Y.-L. Song and H.-M. Sun, *Tetrahedron Lett.* 2023, **127**, 154690.
- [15] Y.-S. Liao and C.-F. Liang, *Org. Biomol. Chem.* 2018, **16**, 1871–1881.
- [16] M. A. K. Zarchi and M. Nejabat, *J. Appl. Polym. Sci.* 2012, **125**, 1041–1048.
- [17] J. Chung, U. R. Seo, S. Chun and Y. K. Chung, *ChemCatChem* 2016, **8**, 318–321.
- [18] X. Qi, Z.-P. Bao, X.-T. Yao and X.-F. Wu, *Org. Lett.* 2020, **22**, 6671–6676.
- [19] L.-W. Pan, N. Taniguchi, M. Hyodo and I. Ryu, *Eur. J. Org. Chem.* 2024, **27**, e202400138.
